# Supplementary material for: Identification of Ku70 Domain-Specific Interactors Using BioID2
Source: Cells. 2021 Mar 14;10(3):646. doi: 10.3390/cells10030646 (PMC8001828; doi:10.3390/cells10030646)
Supplement: Supplementary file 1 [file cells-10-00646-s001.zip]

Archive with 6 entries (6 files):
- Supplemental Figures.pdf
- Table S1 - Comparing filtered BioID2 candidates appearing in one or more replicates.xlsx
- Table S2 - Comparing filtered BioID2 candidates appearing in two or more replicates.xlsx
- Table S3 - Comparing filtered BioID2 candidates appearing in three replicates.xlsx
- Table S4 - Ku70 vWA- and delta vWA-specific BioID2 candidates.xlsx
- Table S5 - SAINTexpress candidates scoring greater than or equal to 0.6.xlsx
