# Supplementary material for: Identification of Ku70 Domain-Specific Interactors Using BioID2
Source: Cells. 2021 Mar 14;10(3):646. doi: 10.3390/cells10030646 (PMC8001828; doi:10.3390/cells10030646)
Supplement: Supplementary file 1 [file cells-10-00646-s001.zip › Table S1 - Comparing filtered BioID2 candidates appearing in one or more replicates.xlsx]

## Sheet: Construct-specific
Ku70-BioID2-specific proteins (n=172)			Ku70 vWA-BioID2-specific proteins (n=327)			Ku70 ∆vWA-BioID2-specific proteins (n=307)
Gene Name	Full Name		Gene Name	Full Name		Gene Name	Full Name
TUBA4A	Tubulin alpha-4A chain		C10orf118	Uncharacterized protein C10orf118		HSPA1L	Heat shock 70 kDa protein 1-like
ACTBL2	Beta-actin-like protein 2		PRKAR2A	cAMP-dependent protein kinase type II-alpha regulatory subunit		FLNC	Filamin-C
PPP1CB	Serine/threonine-protein phosphatase PP1-beta catalytic subunit		GLO1	Lactoylglutathione lyase		SRP54	Signal recognition particle 54 kDa protein
RBMXL3	RNA-binding motif protein, X-linked-like-3		CDC42BPA	Serine/threonine-protein kinase MRCK alpha		COBL	Protein cordon-bleu
PHF21A	PHD finger protein 21A		ABR	Active breakpoint cluster region-related protein		PTCD3	Pentatricopeptide repeat domain-containing protein 3, mitochondrial
WDR33	pre-mRNA 3' end processing protein WDR33		MAVS	Mitochondrial antiviral-signaling protein		MGME1	Mitochondrial genome maintenance exonuclease 1
TOPBP1	DNA topoisomerase 2-binding protein 1		ZNF687	Zinc finger protein 687		C17orf80	Uncharacterized protein C17orf80
CHD1L	Chromodomain-helicase-DNA-binding protein 1-like		TPD52L2	Tumor protein D54		KIF1B	Kinesin-like protein KIF1B
AATF	Protein AATF		PIPSL	Putative PIP5K1A and PSMD4-like protein		SSBP1	Single-stranded DNA-binding protein, mitochondrial
SCAF11	Protein SCAF11		TMEM57	Macoilin		TPM1	Tropomyosin alpha-1 chain
CUX1	Protein CASP		ARPIN	Arpin		TPM3	Tropomyosin alpha-3 chain
SCAF4	Splicing factor, arginine/serine-rich 15		CARD11	Caspase recruitment domain-containing protein 11		TPM4	Tropomyosin alpha-4 chain
PGAM2	Phosphoglycerate mutase 2		EPS15L1	Epidermal growth factor receptor substrate 15-like 1		LRRFIP1	Leucine-rich repeat flightless-interacting protein 1
BYSL	Bystin		FAM169A	Soluble lamin-associated protein of 75 kDa		CNOT1	CCR4-NOT transcription complex subunit 1
DDX51	ATP-dependent RNA helicase DDX51		SYNJ1	Synaptojanin-1		POGZ	Pogo transposable element with ZNF domain
KIF22	Kinesin-like protein KIF22		EPB41	Protein 4.1		DNAJA3	DnaJ homolog subfamily A member 3, mitochondrial
HSP90AA4P	Putative heat shock protein HSP 90-alpha A4		ARPC5	Actin-related protein 2/3 complex subunit 5		ZNF598	Zinc finger protein 598
RAB8A	Ras-related protein Rab-8A		LSM14A	Protein LSM14 homolog A		SURF4	Surfeit locus protein 4
RAB8B	Ras-related protein Rab-8B		CLINT1	Clathrin interactor 1		NUP93	Nuclear pore complex protein Nup93
RAB35	Ras-related protein Rab-35		PAK4	Serine/threonine-protein kinase PAK 4		RPS27	40S ribosomal protein S27
RAB15	Ras-related protein Rab-15		GOT2	Aspartate aminotransferase, mitochondrial		RPS27L	40S ribosomal protein S27-like
RAB13	Ras-related protein Rab-13		ASAP1	Arf-GAP with SH3 domain, ANK repeat and PH domain-containing protein 1		TRMT1L	TRMT1-like protein
CFL2	Cofilin-2		RPAP3	RNA polymerase II-associated protein 3		DDX54	ATP-dependent RNA helicase DDX54
MFAP1	Microfibrillar-associated protein 1		STIP1	Stress-induced-phosphoprotein 1		MRPS10	28S ribosomal protein S10, mitochondrial
NFRKB	Nuclear factor related to kappa-B-binding protein		PYGB	Glycogen phosphorylase, brain form		HIST2H2BD	Putative histone H2B type 2-D
PAF1	RNA polymerase II-associated factor 1 homolog		NDE1	Nuclear distribution protein nudE homolog 1		HIST2H2BC	Putative histone H2B type 2-C
PHAX	Phosphorylated adapter RNA export protein		NDEL1	Nuclear distribution protein nudE-like 1		MYO1C	Unconventional myosin-Ic
EP400	E1A-binding protein p400		ATE1	Arginyl-tRNA--protein transferase 1		LAS1L	Ribosomal biogenesis protein LAS1L
NUFIP1	Nuclear fragile X mental retardation-interacting protein 1		ABLIM1	Actin-binding LIM protein 1		DLD	Dihydrolipoyl dehydrogenase, mitochondrial
BAZ2A	Bromodomain adjacent to zinc finger domain protein 2A		PLEKHA1	Pleckstrin homology domain-containing family A member 1		DHX40	Probable ATP-dependent RNA helicase DHX40
DPF2	Zinc finger protein ubi-d4		SIKE1	Suppressor of IKBKE 1		DICER1	Endoribonuclease Dicer
THUMPD1	THUMP domain-containing protein 1		PDCL3	Phosducin-like protein 3		BAP18	Chromatin complexes subunit BAP18
RBM5	RNA-binding protein 5		YTHDF2	YTH domain family protein 2		MTIF2	Translation initiation factor IF-2, mitochondrial
BTAF1	TATA-binding protein-associated factor 172		SRSF9	Serine/arginine-rich splicing factor 9		MRPL48	39S ribosomal protein L48, mitochondrial
FKBP5	Peptidyl-prolyl cis-trans isomerase FKBP5		SNX3	Sorting nexin-3		CPSF1	Cleavage and polyadenylation specificity factor subunit 1
ZNF24	Zinc finger protein 24		TAOK3	Serine/threonine-protein kinase TAO3		KIF18A	Kinesin-like protein KIF18A
PGAM5	Serine/threonine-protein phosphatase PGAM5, mitochondrial		TAOK1	Serine/threonine-protein kinase TAO1		BCAS3	Breast carcinoma-amplified sequence 3
NCOA6	Nuclear receptor coactivator 6		SORBS1	Sorbin and SH3 domain-containing protein 1		TSFM	Elongation factor Ts, mitochondrial
PSMC3	26S protease regulatory subunit 6A		TBCE	Tubulin-specific chaperone E		FARSB	Phenylalanine--tRNA ligase beta subunit
MMRN1	Multimerin-1		ASF1A	Histone chaperone ASF1A		DDX31	Probable ATP-dependent RNA helicase DDX31
RYR2	Ryanodine receptor 2		DNAJC17	DnaJ homolog subfamily C member 17		SH3GL1	Endophilin-A2
RNF169	E3 ubiquitin-protein ligase RNF169		SOX11	Transcription factor SOX-11		ALDH1B1	Aldehyde dehydrogenase X, mitochondrial
SKP2	S-phase kinase-associated protein 2		DNM3	Dynamin-3		BANF1	Barrier-to-autointegration factor
OTUD7A	OTU domain-containing protein 7A		C19orf12	Protein C19orf12		NUP205	Nuclear pore complex protein Nup205
YEATS2	YEATS domain-containing protein 2		CUEDC2	CUE domain-containing protein 2		TOMM22	Mitochondrial import receptor subunit TOM22 homolog
ZC3H8	Zinc finger CCCH domain-containing protein 8		STX5	Syntaxin-5		TRIM41	E3 ubiquitin-protein ligase TRIM41
TLE3	Transducin-like enhancer protein 3		SARS	Serine--tRNA ligase, cytoplasmic		ACOT9	Acyl-coenzyme A thioesterase 9, mitochondrial
SETX	Probable helicase senataxin		DYNC2H1	Cytoplasmic dynein 2 heavy chain 1		EIF2B4	Translation initiation factor eIF-2B subunit delta
WRNIP1	ATPase WRNIP1		OCRL	Inositol polyphosphate 5-phosphatase OCRL-1		DDX56	Probable ATP-dependent RNA helicase DDX56
NUAK1	NUAK family SNF1-like kinase 1		STAT1	Signal transducer and activator of transcription 1-alpha/beta		NIN	Ninein
RPL37	60S ribosomal protein L37		MAPRE3	Microtubule-associated protein RP/EB family member 3		PRPF19	Pre-mRNA-processing factor 19
GSAP	Gamma-secretase-activating protein		RAPH1	Ras-associated and pleckstrin homology domains-containing protein 1		SUPV3L1	ATP-dependent RNA helicase SUPV3L1, mitochondrial
EXOSC3	Exosome complex component RRP40		USP33	Ubiquitin carboxyl-terminal hydrolase 33		PSMD8	26S proteasome non-ATPase regulatory subunit 8
UNC5D	Netrin receptor UNC5D		FAM110D	Protein FAM110D		CCDC8	Coiled-coil domain-containing protein 8
BRAF	Serine/threonine-protein kinase B-raf		NCOA7	Nuclear receptor coactivator 7		ARID3A	AT-rich interactive domain-containing protein 3A
PLBD2	Putative phospholipase B-like 2		C2orf72	Uncharacterized protein C2orf72		LPCAT1	Lysophosphatidylcholine acyltransferase 1
ZFPM1	Zinc finger protein ZFPM1		LRFN2	Leucine-rich repeat and fibronectin type-III domain-containing protein 2		KIF11	Kinesin-like protein KIF11
CDK4	Cyclin-dependent kinase 4		NUDCD2	NudC domain-containing protein 2		IARS	Isoleucine--tRNA ligase, cytoplasmic
COL9A1	Collagen alpha-1(IX) chain		KCTD2	BTB/POZ domain-containing protein KCTD2		DNM1L	Dynamin-1-like protein
KIAA1109	Uncharacterized protein KIAA1109		TAP2	Antigen peptide transporter 2		KIF4A	Chromosome-associated kinesin KIF4A
SHMT1	Serine hydroxymethyltransferase, cytosolic		MTMR10	Myotubularin-related protein 10		KIF4B	Chromosome-associated kinesin KIF4B
PDLIM4	PDZ and LIM domain protein 4		STAG3	Cohesin subunit SA-3		ARHGEF2	Rho guanine nucleotide exchange factor 2
LHX6	LIM/homeobox protein Lhx6		GBF1	Golgi-specific brefeldin A-resistance guanine nucleotide exchange factor 1		AK3	GTP:AMP phosphotransferase AK3, mitochondrial
ANP32D	Acidic leucine-rich nuclear phosphoprotein 32 family member D		PDZD2	PDZ domain-containing protein 2		CAD	CAD protein
ANP32B	Acidic leucine-rich nuclear phosphoprotein 32 family member B		EIF5	Eukaryotic translation initiation factor 5		ERCC6L2	DNA excision repair protein ERCC-6-like 2
ABHD11	Alpha/beta hydrolase domain-containing protein 11		CACNA1D	Voltage-dependent L-type calcium channel subunit alpha-1D		TWF1	Twinfilin-1
HECW2	E3 ubiquitin-protein ligase HECW2		TNRC18	Trinucleotide repeat-containing gene 18 protein		TECR	Very-long-chain enoyl-CoA reductase
CCDC110	Coiled-coil domain-containing protein 110		PPP1R3E	Protein phosphatase 1 regulatory subunit 3E		TNIK	TRAF2 and NCK-interacting protein kinase
DDX47	Probable ATP-dependent RNA helicase DDX47		SHC1	SHC-transforming protein 1		DRG1	Developmentally-regulated GTP-binding protein 1
PRPF38B	Pre-mRNA-splicing factor 38B		STK40	Serine/threonine-protein kinase 40		ASCC3	Activating signal cointegrator 1 complex subunit 3
GMEB2	Glucocorticoid modulatory element-binding protein 2		CDHR5	Cadherin-related family member 5		TRMT10C	Mitochondrial ribonuclease P protein 1
PLEC	Plectin		FBXL7	F-box/LRR-repeat protein 7		SEPT11	Septin-11
PRAMEF2	PRAME family member 2		FNBP4	Formin-binding protein 4		CHTOP	Chromatin target of PRMT1 protein
FAT4	Protocadherin Fat 4		HYOU1	Hypoxia up-regulated protein 1		ATP5C1	ATP synthase subunit gamma, mitochondrial
FRMPD4	FERM and PDZ domain-containing protein 4		MSC	Musculin		FLOT2	Flotillin-2
SLC4A7	Sodium bicarbonate cotransporter 3		ATXN3	Ataxin-3		SKIV2L	Helicase SKI2W
DHRS9	Dehydrogenase/reductase SDR family member 9		RBMS2	RNA-binding motif, single-stranded-interacting protein 2		RTCB	tRNA-splicing ligase RtcB homolog
MAN1A1	Mannosyl-oligosaccharide 1,2-alpha-mannosidase IA		PEX1	Peroxisome biogenesis factor 1		ZNF326	DBIRD complex subunit ZNF326
NMRAL1	NmrA-like family domain-containing protein 1		COL12A1	Collagen alpha-1(XII) chain		BTF3L4	Transcription factor BTF3 homolog 4
EGFLAM	Pikachurin		ERC2	ERC protein 2		RAB3GAP2	Rab3 GTPase-activating protein non-catalytic subunit
COL27A1	Collagen alpha-1(XXVII) chain		HSPA2	Heat shock-related 70 kDa protein 2		PARVA	Alpha-parvin
DEF6	Differentially expressed in FDCP 6 homolog		ERBB2IP	Protein LAP2		NOL9	Polynucleotide 5'-hydroxyl-kinase NOL9
FAM208B	Protein FAM208B		DNAJB4	DnaJ homolog subfamily B member 4		COPB1	Coatomer subunit beta
GPR179	Probable G-protein coupled receptor 179		PIAS3	E3 SUMO-protein ligase PIAS3		WNK1	Serine/threonine-protein kinase WNK1
MLIP	Muscular LMNA-interacting protein		ERCC6L	DNA excision repair protein ERCC-6-like		MRPS22	28S ribosomal protein S22, mitochondrial
GREB1L	GREB1-like protein		LCP1	Plastin-2		RSBN1	Round spermatid basic protein 1
LYST	Lysosomal-trafficking regulator		PABPC4	Polyadenylate-binding protein 4		ATP6V1H	V-type proton ATPase subunit H
CTTNBP2	Cortactin-binding protein 2		AZI1	5-azacytidine-induced protein 1		MRPS26	28S ribosomal protein S26, mitochondrial
POF1B	Protein POF1B		IGF2R	Cation-independent mannose-6-phosphate receptor		POLR3A	DNA-directed RNA polymerase III subunit RPC1
PRSS2	Trypsin-2		ANK3	Ankyrin-3		RPS12	40S ribosomal protein S12
HBB	Hemoglobin subunit beta		CTPS1	CTP synthase 1		ZNF516	Zinc finger protein 516
ECM1	Extracellular matrix protein 1		EEF1B2	Elongation factor 1-beta		SULT1A1	Sulfotransferase 1A1
PRR3	Proline-rich protein 3		LMO7	LIM domain only protein 7		SULT1A2	Sulfotransferase 1A2
CHD9	Chromodomain-helicase-DNA-binding protein 9		MYBL2	Myb-related protein B		SULT1A3	Sulfotransferase 1A3/1A4
HNRNPLL	Heterogeneous nuclear ribonucleoprotein L-like		RAB11FIP1	Rab11 family-interacting protein 1		KLHDC10	Kelch domain-containing protein 10
ZNF281	Zinc finger protein 281		COPRS	Coordinator of PRMT5 and differentiation stimulator		RPS15	40S ribosomal protein S15
WDR74	WD repeat-containing protein 74		TLK2	Serine/threonine-protein kinase tousled-like 2		RPLP2	60S acidic ribosomal protein P2
DSC3	Desmocollin-3		TADA3	Transcriptional adapter 3		SRPK2	SRSF protein kinase 2
BTN1A1	Butyrophilin subfamily 1 member A1		YTHDF3	YTH domain family protein 3		SLC38A2	Sodium-coupled neutral amino acid transporter 2
EFTUD2	116 kDa U5 small nuclear ribonucleoprotein component		ZYX	Zyxin		RNMTL1	RNA methyltransferase-like protein 1
ALOXE3	Hydroperoxide isomerase ALOXE3		LZIC	Protein LZIC		LRWD1	Leucine-rich repeat and WD repeat-containing protein 1
SERPINB3	Serpin B3		CEP350	Centrosome-associated protein 350		MYCBP2	Probable E3 ubiquitin-protein ligase MYCBP2
ACTN1	Alpha-actinin-1		HELZ	Probable helicase with zinc finger domain		DDX10	Probable ATP-dependent RNA helicase DDX10
AVEN	Cell death regulator Aven		SAMM50	Sorting and assembly machinery component 50 homolog		ZNF692	Zinc finger protein 692
WDR43	WD repeat-containing protein 43		CXADR	Coxsackievirus and adenovirus receptor		PUS1	tRNA pseudouridine synthase A, mitochondrial
PSMB6	Proteasome subunit beta type-6		FOXJ3	Forkhead box protein J3		SREK1IP1	Protein SREK1IP1
RBM6	RNA-binding protein 6		C5orf45	UPF0544 protein C5orf45		PHF23	PHD finger protein 23
GCFC2	GC-rich sequence DNA-binding factor 2		FXR2	Fragile X mental retardation syndrome-related protein 2		LCOR	Ligand-dependent corepressor
LTF	Lactotransferrin		TPD52	Tumor protein D52		CTSB	Cathepsin B
CMYA5	Cardiomyopathy-associated protein 5		DENR	Density-regulated protein		FOXK1	Forkhead box protein K1
POLR2A	DNA-directed RNA polymerase II subunit RPB1		CRIP2	Cysteine-rich protein 2		SYNGR2	Synaptogyrin-2
ASTN2	Astrotactin-2		YWHAB	14-3-3 protein beta/alpha		CBX1	Chromobox protein homolog 1
TRMT61B	tRNA (adenine(58)-N(1))-methyltransferase, mitochondrial		NEFM	Neurofilament medium polypeptide		DAP3	28S ribosomal protein S29, mitochondrial
DDX39A	ATP-dependent RNA helicase DDX39A		PAPOLA	Poly(A) polymerase alpha		SEC61A1	Protein transport protein Sec61 subunit alpha isoform 1
RBM4B	RNA-binding protein 4B		RAB27A	Ras-related protein Rab-27A		RBFOX3	RNA binding protein fox-1 homolog 3
RBM4	RNA-binding protein 4		CTR9	RNA polymerase-associated protein CTR9 homolog		RBFOX2	RNA binding protein fox-1 homolog 2
LDHC	L-lactate dehydrogenase C chain		CEP41	Centrosomal protein of 41 kDa		RBFOX1	RNA binding protein fox-1 homolog 1
KLHDC7A	Kelch domain-containing protein 7A		PRRC2B	Protein PRRC2B		SGOL2	Shugoshin-like 2
ERO1LB	ERO1-like protein beta		PPP6R3	Serine/threonine-protein phosphatase 6 regulatory subunit 3		TSN	Translin
ERO1L	ERO1-like protein alpha		STK10	Serine/threonine-protein kinase 10		ATP6V1A	V-type proton ATPase catalytic subunit A
ZNF703	Zinc finger protein 703		DFFA	DNA fragmentation factor subunit alpha		MRPL16	39S ribosomal protein L16, mitochondrial
SIRT1	NAD-dependent protein deacetylase sirtuin-1		SSFA2	Sperm-specific antigen 2		FAF2	FAS-associated factor 2
C1QTNF5	Complement C1q tumor necrosis factor-related protein 5		CRMP1	Dihydropyrimidinase-related protein 1		EIF1	Eukaryotic translation initiation factor 1
KREMEN2	Kremen protein 2		PTPN1	Tyrosine-protein phosphatase non-receptor type 1		EIF1B	Eukaryotic translation initiation factor 1b
C8orf59	Uncharacterized protein C8orf59		NDUFA4	NADH dehydrogenase [ubiquinone] 1 alpha subcomplex subunit 4		NUP160	Nuclear pore complex protein Nup160
SYNM	Synemin		KIAA1598	Shootin-1		CORO1C	Coronin-1C
RGL2	Ral guanine nucleotide dissociation stimulator-like 2		RAB2A	Ras-related protein Rab-2A		SETD1A	Histone-lysine N-methyltransferase SETD1A
KSR1	Kinase suppressor of Ras 1		ETFB	Electron transfer flavoprotein subunit beta		BSG	Basigin
COL6A3	Collagen alpha-3(VI) chain		PYGL	Glycogen phosphorylase, liver form		PRPSAP2	Phosphoribosyl pyrophosphate synthase-associated protein 2
PSD3	PH and SEC7 domain-containing protein 3		KIF14	Kinesin-like protein KIF14		NSF	Vesicle-fusing ATPase
ADPRHL2	Poly(ADP-ribose) glycohydrolase ARH3		PPP6R1	Serine/threonine-protein phosphatase 6 regulatory subunit 1		PPA2	Inorganic pyrophosphatase 2, mitochondrial
JARID2	Protein Jumonji		LIMA1	LIM domain and actin-binding protein 1		C14orf166	UPF0568 protein C14orf166
SOBP	Sine oculis-binding protein homolog		FGFR1OP2	FGFR1 oncogene partner 2		NPLOC4	Nuclear protein localization protein 4 homolog
KCNQ3	Potassium voltage-gated channel subfamily KQT member 3		PPP2CB	Serine/threonine-protein phosphatase 2A catalytic subunit beta isoform		VMP1	Vacuole membrane protein 1
RIPK1	Receptor-interacting serine/threonine-protein kinase 1		PPP2CA	Serine/threonine-protein phosphatase 2A catalytic subunit alpha isoform		SUZ12	Polycomb protein SUZ12
KCTD19	BTB/POZ domain-containing protein KCTD19		GRIP1	Glutamate receptor-interacting protein 1		MYO1B	Unconventional myosin-Ib
GLI2	Zinc finger protein GLI2		MCM3	DNA replication licensing factor MCM3		NDUFS1	NADH-ubiquinone oxidoreductase 75 kDa subunit, mitochondrial
MAP2K4	Dual specificity mitogen-activated protein kinase kinase 4		CEP85	Centrosomal protein of 85 kDa		MSH3	DNA mismatch repair protein Msh3
RADIL	Ras-associating and dilute domain-containing protein		NDRG1	Protein NDRG1		SIGLEC7	Sialic acid-binding Ig-like lectin 7
CCDC114	Coiled-coil domain-containing protein 114		NEBL	Nebulette		CLSPN	Claspin
SMARCC1	SWI/SNF complex subunit SMARCC1		PRDX5	Peroxiredoxin-5, mitochondrial		ETF1	Eukaryotic peptide chain release factor subunit 1
NAV2	Neuron navigator 2		ZDBF2	DBF4-type zinc finger-containing protein 2		COX4I1	Cytochrome c oxidase subunit 4 isoform 1, mitochondrial
NAV3	Neuron navigator 3		WRAP53	Telomerase Cajal body protein 1		FSCN1	Fascin
MTUS1	Microtubule-associated tumor suppressor 1		PPP1R2P3	Protein phosphatase inhibitor 2-like protein 3		TROVE2	60 kDa SS-A/Ro ribonucleoprotein
GPR88	Probable G-protein coupled receptor 88		PPP1R2P1	Putative protein phosphatase inhibitor 2-like protein 1		AXIN2	Axin-2
PITRM1	Presequence protease, mitochondrial		PPP1R2	Protein phosphatase inhibitor 2		TBC1D10B	TBC1 domain family member 10B
COL11A1	Collagen alpha-1(XI) chain		PPP1R12C	Protein phosphatase 1 regulatory subunit 12C		LGALS7	Galectin-7
RBMXL1	RNA binding motif protein, X-linked-like-1		SMARCA4	Transcription activator BRG1		PKN2	Serine/threonine-protein kinase N2
SMARCA1	Probable global transcription activator SNF2L1		SMG9	Protein SMG9		OSBPL8	Oxysterol-binding protein-related protein 8
RAPGEFL1	Rap guanine nucleotide exchange factor-like 1		PLS3	Plastin-3		ACADSB	Short/branched chain specific acyl-CoA dehydrogenase, mitochondrial
CNP	2',3'-cyclic-nucleotide 3'-phosphodiesterase		SMAP2	Stromal membrane-associated protein 2		RPL39P5	Putative 60S ribosomal protein L39-like 5
APRT	Adenine phosphoribosyltransferase		MAX	Protein max		RPL39	60S ribosomal protein L39
LCN1P1	Putative lipocalin 1-like protein 1		SPTAN1	Spectrin alpha chain, non-erythrocytic 1		MAP2K1	Dual specificity mitogen-activated protein kinase kinase 1
LCN1	Lipocalin-1		ARFGAP1	ADP-ribosylation factor GTPase-activating protein 1		MAP2K2	Dual specificity mitogen-activated protein kinase kinase 2
S100A16	Protein S100-A16		EPN3	Epsin-3		RPP30	Ribonuclease P protein subunit p30
ZNF469	Zinc finger protein 469		EPN2	Epsin-2		NAGLU	Alpha-N-acetylglucosaminidase
PALM3	Paralemmin-3		MTFR1	Mitochondrial fission regulator 1		AP2A1	AP-2 complex subunit alpha-1
FAM179B	Protein FAM179B		CASP3	Caspase-3		DSTN	Destrin
ANKS1A	Ankyrin repeat and SAM domain-containing protein 1A		STAG1	Cohesin subunit SA-1		XKR7	XK-related protein 7
FRMD6-AS1	Putative uncharacterized protein FRMD6-AS1		RCN1	Reticulocalbin-1		COL16A1	Collagen alpha-1(XVI) chain
MAP1A	Microtubule-associated protein 1A		PPIE	Peptidyl-prolyl cis-trans isomerase E		UTP23	rRNA-processing protein UTP23 homolog
GSPT2	Eukaryotic peptide chain release factor GTP-binding subunit ERF3B		AIF1L	Allograft inflammatory factor 1-like		FTMT	Ferritin, mitochondrial
IGHMBP2	DNA-binding protein SMUBP-2		DDX59	Probable ATP-dependent RNA helicase DDX59		ELOVL1	Elongation of very long chain fatty acids protein 1
APC2	Adenomatous polyposis coli protein 2		HINT1	Histidine triad nucleotide-binding protein 1		NDUFAF5	NADH dehydrogenase [ubiquinone] 1 alpha subcomplex assembly factor 5
RAB3GAP1	Rab3 GTPase-activating protein catalytic subunit		RNF219	RING finger protein 219		BARD1	BRCA1-associated RING domain protein 1
LTBP3	Latent-transforming growth factor beta-binding protein 3		IGBP1	Immunoglobulin-binding protein 1		MBOAT7	Lysophospholipid acyltransferase 7
WDR24	WD repeat-containing protein 24		NF2	Merlin		TCEA2	Transcription elongation factor A protein 2
TRIM67	Tripartite motif-containing protein 67		BCL11B	B-cell lymphoma/leukemia 11B		GPC2	Glypican-2
MUC16	Mucin-16		RAB9A	Ras-related protein Rab-9A		SCN2A	Sodium channel protein type 2 subunit alpha
LRP1B	Low-density lipoprotein receptor-related protein 1B		MAP7D1	MAP7 domain-containing protein 1		ACTL6A	Actin-like protein 6A
LLGL1	Lethal(2) giant larvae protein homolog 1		MPP6	MAGUK p55 subfamily member 6		FDPS	Farnesyl pyrophosphate synthase
OLFML3	Olfactomedin-like protein 3		SP100	Nuclear autoantigen Sp-100		EHMT1	Histone-lysine N-methyltransferase EHMT1
			SP140L	Nuclear body protein SP140-like protein		MRPS18A	28S ribosomal protein S18a, mitochondrial
			KPNA1	Importin subunit alpha-5		WDFY4	WD repeat- and FYVE domain-containing protein 4
			NAB2	NGFI-A-binding protein 2		DCTN1	Dynactin subunit 1
			UBN2	Ubinuclein-2		MAGI2	Membrane-associated guanylate kinase, WW and PDZ domain-containing protein 2
			PREB	Prolactin regulatory element-binding protein		RRAGC	Ras-related GTP-binding protein C
			UBE2O	Ubiquitin-conjugating enzyme E2 O		RRAGD	Ras-related GTP-binding protein D
			TBC1D13	TBC1 domain family member 13		POLR1C	DNA-directed RNA polymerases I and III subunit RPAC1
			COPZ1	Coatomer subunit zeta-1		VARS2	Valine--tRNA ligase, mitochondrial
			GSPT1	Eukaryotic peptide chain release factor GTP-binding subunit ERF3A		RASIP1	Ras-interacting protein 1
			ESYT2	Extended synaptotagmin-2		WARS	Tryptophan--tRNA ligase, cytoplasmic
			PDHA2	Pyruvate dehydrogenase E1 component subunit alpha, testis-specific form, mitochondrial		CLPX	ATP-dependent Clp protease ATP-binding subunit clpX-like, mitochondrial
			EPS8	Epidermal growth factor receptor kinase substrate 8		DMD	Dystrophin
			RIOK1	Serine/threonine-protein kinase RIO1		SHROOM2	Protein Shroom2
			HAUS8	HAUS augmin-like complex subunit 8		UPF1	Regulator of nonsense transcripts 1
			TAL1	T-cell acute lymphocytic leukemia protein 1		HSD17B4	Peroxisomal multifunctional enzyme type 2
			SPAG5	Sperm-associated antigen 5		GRM1	Metabotropic glutamate receptor 1
			SCRIB	Protein scribble homolog		FARS2	Phenylalanine--tRNA ligase, mitochondrial
			BRDT	Bromodomain testis-specific protein		IARS2	Isoleucine--tRNA ligase, mitochondrial
			PSME3	Proteasome activator complex subunit 3		SPNS1	Protein spinster homolog 1
			MICAL3	Protein-methionine sulfoxide oxidase MICAL3		USP6NL	USP6 N-terminal-like protein
			LUZP1	Leucine zipper protein 1		IPO5	Importin-5
			SRSF4	Serine/arginine-rich splicing factor 4		RFX7	DNA-binding protein RFX7
			CSRP2	Cysteine and glycine-rich protein 2		MCM6	DNA replication licensing factor MCM6
			HARS	Histidine--tRNA ligase, cytoplasmic		FIGNL2	Putative fidgetin-like protein 2
			NFIB	Nuclear factor 1 B-type		SLC12A5	Solute carrier family 12 member 5
			KIAA1211	Uncharacterized protein KIAA1211		HINT2	Histidine triad nucleotide-binding protein 2, mitochondrial
			MYH2	Myosin-2		BAG2	BAG family molecular chaperone regulator 2
			CALML3	Calmodulin-like protein 3		OR51B6	Olfactory receptor 51B6
			GTPBP1	GTP-binding protein 1		TTC3	E3 ubiquitin-protein ligase TTC3
			TNKS1BP1	182 kDa tankyrase-1-binding protein		UTRN	Utrophin
			ULK1	Serine/threonine-protein kinase ULK1		SRRM5	Serine/arginine repetitive matrix protein 5
			NCK1	Cytoplasmic protein NCK1		C19orf53	Leydig cell tumor 10 kDa protein homolog
			NCK2	Cytoplasmic protein NCK2		POLR2B	DNA-directed RNA polymerase II subunit RPB2
			URB1	Nucleolar pre-ribosomal-associated protein 1		POR	NADPH--cytochrome P450 reductase
			CEP55	Centrosomal protein of 55 kDa		MARCO	Macrophage receptor MARCO
			EME2	Probable crossover junction endonuclease EME2		LPP	Lipoma-preferred partner
			COL4A5	Collagen alpha-5(IV) chain		ERCC6	DNA excision repair protein ERCC-6
			TLX1	T-cell leukemia homeobox protein 1		SEMA6A	Semaphorin-6A
			ABCE1	ATP-binding cassette sub-family E member 1		SH2B1	SH2B adapter protein 1
			PCNT	Pericentrin		THRB	Thyroid hormone receptor beta
			ITGA3	Integrin alpha-3		GGNBP2	Gametogenetin-binding protein 2
			SPTA1	Spectrin alpha chain, erythrocytic 1		GALNT10	Polypeptide N-acetylgalactosaminyltransferase 10
			ABCD3	ATP-binding cassette sub-family D member 3		MRPL44	39S ribosomal protein L44, mitochondrial
			COPA	Coatomer subunit alpha		RAPGEF3	Rap guanine nucleotide exchange factor 3
			SMARCC2	SWI/SNF complex subunit SMARCC2		KIAA1210	Uncharacterized protein KIAA1210
			TWF2	Twinfilin-2		MRPL21	39S ribosomal protein L21, mitochondrial
			KMT2B	Histone-lysine N-methyltransferase 2B		MARCH11	E3 ubiquitin-protein ligase MARCH11
			OGDH	2-oxoglutarate dehydrogenase, mitochondrial		SEL1L3	Protein sel-1 homolog 3
			TAX1BP1	Tax1-binding protein 1		ZCCHC8	Zinc finger CCHC domain-containing protein 8
			RFX6	DNA-binding protein RFX6		PFKL	6-phosphofructokinase, liver type
			CEP170	Centrosomal protein of 170 kDa		SKOR1	SKI family transcriptional corepressor 1
			COL22A1	Collagen alpha-1(XXII) chain		RPP38	Ribonuclease P protein subunit p38
			PVRL2	Poliovirus receptor-related protein 2		ADAL	Adenosine deaminase-like protein
			NAV1	Neuron navigator 1		RAB34	Ras-related protein Rab-34
			ABL2	Abelson tyrosine-protein kinase 2		UGGT1	UDP-glucose:glycoprotein glucosyltransferase 1
			EXD3	Probable exonuclease mut-7 homolog		ARHGEF19	Rho guanine nucleotide exchange factor 19
			UNC119B	Protein unc-119 homolog B		RPL21	60S ribosomal protein L21
			SOGA2	Protein SOGA2		MYOM1	Myomesin-1
			CCNB1	G2/mitotic-specific cyclin-B1		BUB1	Mitotic checkpoint serine/threonine-protein kinase BUB1
			PPID	Peptidyl-prolyl cis-trans isomerase D		TRAPPC5	Trafficking protein particle complex subunit 5
			NPAS3	Neuronal PAS domain-containing protein 3		TP53I3	Quinone oxidoreductase PIG3
			C1QTNF9	Complement C1q and tumor necrosis factor-related protein 9A		TUBA1A	Tubulin alpha-1A chain
			C1QTNF9B	Complement C1q and tumor necrosis factor-related protein 9B		DVL1P1	Putative segment polarity protein dishevelled homolog DVL1P1
			COL6A1	Collagen alpha-1(VI) chain		GNA13	Guanine nucleotide-binding protein subunit alpha-13
			DAZAP1	DAZ-associated protein 1		GNAT1	Guanine nucleotide-binding protein G(t) subunit alpha-1
			SNTB1	Beta-1-syntrophin		GNAT3	Guanine nucleotide-binding protein G(t) subunit alpha-3
			ITGB6	Integrin beta-6		GNAT2	Guanine nucleotide-binding protein G(t) subunit alpha-2
			ITGB1	Integrin beta-1		GNAO1	Guanine nucleotide-binding protein G(o) subunit alpha
			C12orf42	Uncharacterized protein C12orf42		GNAI2	Guanine nucleotide-binding protein G(i) subunit alpha-2
			ZBTB4	Zinc finger and BTB domain-containing protein 4		GNAL	Guanine nucleotide-binding protein G(olf) subunit alpha
			FNDC1	Fibronectin type III domain-containing protein 1		GNA12	Guanine nucleotide-binding protein subunit alpha-12
			ORC4	Origin recognition complex subunit 4		UBP1	Upstream-binding protein 1
			ATF3	Cyclic AMP-dependent transcription factor ATF-3		ECHDC1	Ethylmalonyl-CoA decarboxylase
			SNAPC4	snRNA-activating protein complex subunit 4		GLS	Glutaminase kidney isoform, mitochondrial
			TTN	Titin		CSNK1A1L	Casein kinase I isoform alpha-like
			IFT27	Intraflagellar transport protein 27 homolog		MAST2	Microtubule-associated serine/threonine-protein kinase 2
			PPP4R1	Serine/threonine-protein phosphatase 4 regulatory subunit 1		PTK6	Protein-tyrosine kinase 6
			GRID2IP	Delphilin		ZNF256	Zinc finger protein 256
			CEP112	Centrosomal protein of 112 kDa		ASXL1	Putative Polycomb group protein ASXL1
			PITX1	Pituitary homeobox 1		PRAME	Melanoma antigen preferentially expressed in tumors
			PEG10	Retrotransposon-derived protein PEG10		COL5A2	Collagen alpha-2(V) chain
			SPAST	Spastin		MNX1	Motor neuron and pancreas homeobox protein 1
			LZTS3	Leucine zipper putative tumor suppressor 3		F5	Coagulation factor V
			LRCH4	Leucine-rich repeat and calponin homology domain-containing protein 4		CTAGE4	cTAGE family member 4
			SNRPB2	U2 small nuclear ribonucleoprotein B''		TARS2	Threonine--tRNA ligase, mitochondrial
			UIMC1	BRCA1-A complex subunit RAP80		EOMES	Eomesodermin homolog
			GALNT12	Polypeptide N-acetylgalactosaminyltransferase 12		ZG16B	Zymogen granule protein 16 homolog B
			COL5A1	Collagen alpha-1(V) chain		AMY1A	Alpha-amylase 1
			IRX2	Iroquois-class homeodomain protein IRX-2		BPIFA2	BPI fold-containing family A member 2
			ANKRD17	Ankyrin repeat domain-containing protein 17		CST1	Cystatin-SN
			CEP192	Centrosomal protein of 192 kDa		CST4	Cystatin-S
			CSTF3	Cleavage stimulation factor subunit 3		REPS2	RalBP1-associated Eps domain-containing protein 2
			DAXX	Death domain-associated protein 6		MUC7	Mucin-7
			UPF3B	Regulator of nonsense transcripts 3B		NME4	Nucleoside diphosphate kinase, mitochondrial
			ZFYVE19	Zinc finger FYVE domain-containing protein 19		SMR3B	Submaxillary gland androgen-regulated protein 3B
			PLIN3	Perilipin-3		SRPR	Signal recognition particle receptor subunit alpha
			IFT20	Intraflagellar transport protein 20 homolog		FOXD4L1	Forkhead box protein D4-like 1
			PDCL	Phosducin-like protein		PIP	Prolactin-inducible protein
			RASEF	Ras and EF-hand domain-containing protein		C4orf40	Uncharacterized protein C4orf40
			SYAP1	Synapse-associated protein 1		SLC18B1	MFS-type transporter SLC18B1
			GNG12	Guanine nucleotide-binding protein G(I)/G(S)/G(O) subunit gamma-12		COL24A1	Collagen alpha-1(XXIV) chain
			DRAP1	Dr1-associated corepressor		GALNT2	Polypeptide N-acetylgalactosaminyltransferase 2
			LEMD3	Inner nuclear membrane protein Man1		RAVER2	Ribonucleoprotein PTB-binding 2
			TERF2IP	Telomeric repeat-binding factor 2-interacting protein 1		DISC1	Disrupted in schizophrenia 1 protein
			SF3B14	Pre-mRNA branch site protein p14		TNFAIP2	Tumor necrosis factor alpha-induced protein 2
			CTTNBP2NL	CTTNBP2 N-terminal-like protein		FREM2	FRAS1-related extracellular matrix protein 2
			GSK3A	Glycogen synthase kinase-3 alpha		ALPK1	Alpha-protein kinase 1
			ASAP2	Arf-GAP with SH3 domain, ANK repeat and PH domain-containing protein 2		NBAS	Neuroblastoma-amplified sequence
			FAM178A	Protein FAM178A		ZNF862	Zinc finger protein 862
			RBM33	RNA-binding protein 33		PHOX2B	Paired mesoderm homeobox protein 2B
			CAMSAP2	Calmodulin-regulated spectrin-associated protein 2		BECN1P1	Beclin-2
			ZNF592	Zinc finger protein 592		ZFYVE28	Lateral signaling target protein 2 homolog
			GRWD1	Glutamate-rich WD repeat-containing protein 1		TXNDC11	Thioredoxin domain-containing protein 11
			RBM22	Pre-mRNA-splicing factor RBM22		ALPK3	Alpha-protein kinase 3
			FXR1	Fragile X mental retardation syndrome-related protein 1		MYCN	N-myc proto-oncogene protein
			FABP5	Fatty acid-binding protein, epidermal		TACC2	Transforming acidic coiled-coil-containing protein 2
			C9orf78	Uncharacterized protein C9orf78		CCDC47	Coiled-coil domain-containing protein 47
			MUC19	Mucin-19		FUCA1	Tissue alpha-L-fucosidase
			FKBP4	Peptidyl-prolyl cis-trans isomerase FKBP4		BCL2L12	Bcl-2-like protein 12
			HS1BP3	HCLS1-binding protein 3		TAPBPL	Tapasin-related protein
			COL9A3	Collagen alpha-3(IX) chain		ZKSCAN1	Zinc finger protein with KRAB and SCAN domains 1
			SHE	SH2 domain-containing adapter protein E		FAM83E	Protein FAM83E
			COL1A2	Collagen alpha-2(I) chain		FLJ46347	Uncharacterized protein FLJ46347
			DNAH17	Dynein heavy chain 17, axonemal		CHL1	Neural cell adhesion molecule L1-like protein
			FAAP20	Fanconi anemia-associated protein of 20 kDa		AIFM3	Apoptosis-inducing factor 3
			SPR	Sepiapterin reductase		MTCH1	Mitochondrial carrier homolog 1
			DMXL2	DmX-like protein 2		STK35	Serine/threonine-protein kinase 35
			KIAA0556	Uncharacterized protein KIAA0556		AKR7A2	Aflatoxin B1 aldehyde reductase member 2
			SH3GLB1	Endophilin-B1		FYB	FYN-binding protein
			HMGN2	Non-histone chromosomal protein HMG-17		NDUFAF2	Mimitin, mitochondrial
			HMGN3	High mobility group nucleosome-binding domain-containing protein 3		LINGO3	Leucine-rich repeat and immunoglobulin-like domain-containing nogo receptor-interacting protein 3
			PLCL2	Inactive phospholipase C-like protein 2		PLS1	Plastin-1
			CACNA1C	Voltage-dependent L-type calcium channel subunit alpha-1C		ITPR3	Inositol 1,4,5-trisphosphate receptor type 3
			GIGYF1	PERQ amino acid-rich with GYF domain-containing protein 1		ATP1A2	Sodium/potassium-transporting ATPase subunit alpha-2
			BSN	Protein bassoon		SPIN3	Spindlin-3
			RBBP5	Retinoblastoma-binding protein 5
			HIC1	Hypermethylated in cancer 1 protein
			SOWAHB	Ankyrin repeat domain-containing protein SOWAHB
			MCC	Colorectal mutant cancer protein
			UBR4	E3 ubiquitin-protein ligase UBR4
			TTBK2	Tau-tubulin kinase 2
			TRIML2	Probable E3 ubiquitin-protein ligase TRIML2
			NCAPD2	Condensin complex subunit 1
			KLHL1	Kelch-like protein 1
			FTO	Alpha-ketoglutarate-dependent dioxygenase FTO
			FAM181B	Protein FAM181B
			RP9	Retinitis pigmentosa 9 protein
			BTBD2	BTB/POZ domain-containing protein 2
			STOM	Erythrocyte band 7 integral membrane protein
			STOML3	Stomatin-like protein 3
			RIC3	Protein RIC-3
			SIPA1L1	Signal-induced proliferation-associated 1-like protein 1
			UBXN7	UBX domain-containing protein 7
			FRRS1L	DOMON domain-containing protein FRRS1L
			MSL1	Male-specific lethal 1 homolog

## Sheet: Shared Two-way
Proteins shared between Ku70-BioID2 and Ku70 vWA-BioID2 (n=63)			Proteins shared between Ku70-BioID2 and Ku70 ∆vWA-BioID2 (n=102)			Proteins shared between Ku70 vWA-BioID2 and Ku70 ∆vWA-BioID2 (n=114)
Gene Name	Full Name		Gene Name	Full Name		Gene Name	Full Name
YLPM1	YLP motif-containing protein 1		HIST2H2AC	Histone H2A type 2-C		EHBP1	EH domain-binding protein 1
TP53BP1	Tumor suppressor p53-binding protein 1		HIST2H2AA3	Histone H2A type 2-A		DBNL	Drebrin-like protein
CCNT2	Cyclin-T2		ZFR	Zinc finger RNA-binding protein		PALLD	Palladin
PHF8	Histone lysine demethylase PHF8		WRN	Werner syndrome ATP-dependent helicase		APBB1	Amyloid beta A4 precursor protein-binding family B member 1
RFX5	DNA-binding protein RFX5		HIST1H1T	Histone H1t		FAM21B	WASH complex subunit FAM21B
MORC2	MORC family CW-type zinc finger protein 2		MYH14	Myosin-14		FAM21A	WASH complex subunit FAM21A
PGAM1	Phosphoglycerate mutase 1		HNRNPH2	Heterogeneous nuclear ribonucleoprotein H2		DIP2B	Disco-interacting protein 2 homolog B
GPATCH11	G patch domain-containing protein 11		ZNF292	Zinc finger protein 292		BICD2	Protein bicaudal D homolog 2
CIC	Protein capicua homolog		TUBB6	Tubulin beta-6 chain		AKAP1	A-kinase anchor protein 1, mitochondrial
DNAJA1	DnaJ homolog subfamily A member 1		CHD3	Chromodomain-helicase-DNA-binding protein 3		IST1	IST1 homolog
TFAP2E	Transcription factor AP-2-epsilon		KIAA1429	Protein virilizer homolog		MACF1	Microtubule-actin cross-linking factor 1, isoforms 1/2/3/5
TFAP2B	Transcription factor AP-2-beta		NASP	Nuclear autoantigenic sperm protein		NEDD1	Protein NEDD1
SPDL1	Protein Spindly		ARID1B	AT-rich interactive domain-containing protein 1B		CCDC85C	Coiled-coil domain-containing protein 85C
NMT2	Glycylpeptide N-tetradecanoyltransferase 2		STRBP	Spermatid perinuclear RNA-binding protein		PSME1	Proteasome activator complex subunit 1
MGC87657	Putative 60S ribosomal protein L13a-like MGC87657		NKRF	NF-kappa-B-repressing factor		DYNC1LI2	Cytoplasmic dynein 1 light intermediate chain 2
ASPH	Aspartyl/asparaginyl beta-hydroxylase		CDK13	Cyclin-dependent kinase 13		ARHGEF16	Rho guanine nucleotide exchange factor 16
MAGOH	Protein mago nashi homolog		USP42	Ubiquitin carboxyl-terminal hydrolase 42		TIGAR	Fructose-2,6-bisphosphatase TIGAR
MAGOHB	Protein mago nashi homolog 2		APLF	Aprataxin and PNK-like factor		ARCN1	Coatomer subunit delta
BOD1L1	Biorientation of chromosomes in cell division protein 1-like 1		MRPS31	28S ribosomal protein S31, mitochondrial		GEMIN5	Gem-associated protein 5
NR2C2	Nuclear receptor subfamily 2 group C member 2		TRPS1	Zinc finger transcription factor Trps1		RANBP1	Ran-specific GTPase-activating protein
WAC	WW domain-containing adapter protein with coiled-coil		MRPS9	28S ribosomal protein S9, mitochondrial		UACA	Uveal autoantigen with coiled-coil domains and ankyrin repeats
CIAPIN1	Anamorsin		TPM3L	Putative tropomyosin alpha-3 chain-like protein		MTMR12	Myotubularin-related protein 12
NT5DC1	5'-nucleotidase domain-containing protein 1		SALL2	Sal-like protein 2		MAPT	Microtubule-associated protein tau
SRSF8	Serine/arginine-rich splicing factor 8		ZNF518B	Zinc finger protein 518B		FMR1	Fragile X mental retardation protein 1
SLAIN2	SLAIN motif-containing protein 2		GTF3C1	General transcription factor 3C polypeptide 1		IFT74	Intraflagellar transport protein 74 homolog
ANXA5	Annexin A5		DGCR8	Microprocessor complex subunit DGCR8		BCR	Breakpoint cluster region protein
S100A11	Protein S100-A11		SAP18	Histone deacetylase complex subunit SAP18		SH3D19	SH3 domain-containing protein 19
CCAR2	Cell cycle and apoptosis regulator protein 2		RPS11	40S ribosomal protein S11		NUFIP2	Nuclear fragile X mental retardation-interacting protein 2
SRSF12	Serine/arginine-rich splicing factor 12		SLC25A13	Calcium-binding mitochondrial carrier protein Aralar2		RAPGEF6	Rap guanine nucleotide exchange factor 6
FAM192A	Protein FAM192A		POLD3	DNA polymerase delta subunit 3		SLK	STE20-like serine/threonine-protein kinase
BRD4	Bromodomain-containing protein 4		ELAC2	Zinc phosphodiesterase ELAC protein 2		DPYSL2	Dihydropyrimidinase-related protein 2
KHDRBS1	KH domain-containing, RNA-binding, signal transduction-associated protein 1		CUX1	Homeobox protein cut-like 1		PPP1R12A	Protein phosphatase 1 regulatory subunit 12A
ZNF830	Zinc finger protein 830		C1QBP	Complement component 1 Q subcomponent-binding protein, mitochondrial		AP3S1	AP-3 complex subunit sigma-1
C17orf85	Uncharacterized protein C17orf85		TFIP11	Tuftelin-interacting protein 11		EML4	Echinoderm microtubule-associated protein-like 4
FLG	Filaggrin		CPSF6	Cleavage and polyadenylation specificity factor subunit 6		MCM4	DNA replication licensing factor MCM4
ALKBH5	RNA demethylase ALKBH5		NOL11	Nucleolar protein 11		GIGYF2	PERQ amino acid-rich with GYF domain-containing protein 2
PSMC5	26S protease regulatory subunit 8		RSF1	Remodeling and spacing factor 1		TXLNA	Alpha-taxilin
CALM1	Calmodulin		DES	Desmin		GKAP1	G kinase-anchoring protein 1
RANBP3	Ran-binding protein 3		AURKAIP1	Aurora kinase A-interacting protein		DRG2	Developmentally-regulated GTP-binding protein 2
API5	Apoptosis inhibitor 5		MRPS18B	28S ribosomal protein S18b, mitochondrial		STUB1	E3 ubiquitin-protein ligase CHIP
XYLT1	Xylosyltransferase 1		SNRPF	Small nuclear ribonucleoprotein F		DPYSL3	Dihydropyrimidinase-related protein 3
HAL	Histidine ammonia-lyase		WIZ	Protein Wiz		TXLNG	Gamma-taxilin
PIWIL3	Piwi-like protein 3		ZNF148	Zinc finger protein 148		ANKZF1	Ankyrin repeat and zinc finger domain-containing protein 1
DCP2	m7GpppN-mRNA hydrolase		MBD3	Methyl-CpG-binding domain protein 3		DNAJC2	DnaJ homolog subfamily C member 2
HIRIP3	HIRA-interacting protein 3		MRPS35	28S ribosomal protein S35, mitochondrial		EDC4	Enhancer of mRNA-decapping protein 4
COL17A1	Collagen alpha-1(XVII) chain		SRPK1	SRSF protein kinase 1		AAK1	AP2-associated protein kinase 1
COL23A1	Collagen alpha-1(XXIII) chain		RACGAP1	Rac GTPase-activating protein 1		ENSA	Alpha-endosulfine
KIAA1143	Uncharacterized protein KIAA1143		EIF4A2	Eukaryotic initiation factor 4A-II		EGLN1	Egl nine homolog 1
DDX41	Probable ATP-dependent RNA helicase DDX41		HSPE1	10 kDa heat shock protein, mitochondrial		FERMT2	Fermitin family homolog 2
TFAP2C	Transcription factor AP-2 gamma		MRPS24	28S ribosomal protein S24, mitochondrial		BAZ2B	Bromodomain adjacent to zinc finger domain protein 2B
TFAP2D	Transcription factor AP-2-delta		ZMYM2	Zinc finger MYM-type protein 2		CKAP5	Cytoskeleton-associated protein 5
NFATC2IP	NFATC2-interacting protein		FLOT1	Flotillin-1		PDZK1IP1	PDZK1-interacting protein 1
RGS14	Regulator of G-protein signaling 14		CCDC71	Coiled-coil domain-containing protein 71		SYNGAP1	Ras/Rap GTPase-activating protein SynGAP
RNF113A	RING finger protein 113A		CTBP2	C-terminal-binding protein 2		MAP4K4	Mitogen-activated protein kinase kinase kinase kinase 4
ZNF207	Zinc finger protein 207		AP2M1	AP-2 complex subunit mu		ZFC3H1	Zinc finger C3H1 domain-containing protein
VCPIP1	Deubiquitinating protein VCIP135		ASPM	Abnormal spindle-like microcephaly-associated protein		TFCP2	Alpha-globin transcription factor CP2
CCDC18	Coiled-coil domain-containing protein 18		RPS15A	40S ribosomal protein S15a		PRDX3	Thioredoxin-dependent peroxide reductase, mitochondrial
RNMT	mRNA cap guanine-N7 methyltransferase		CDIPT	CDP-diacylglycerol--inositol 3-phosphatidyltransferase		CDC37	Hsp90 co-chaperone Cdc37
SHOX2	Short stature homeobox protein 2		RPL10	60S ribosomal protein L10		BRCA1	Breast cancer type 1 susceptibility protein
UCHL1	Ubiquitin carboxyl-terminal hydrolase isozyme L1		ATP5L	ATP synthase subunit g, mitochondrial		MXRA7	Matrix-remodeling-associated protein 7
IDH2	Isocitrate dehydrogenase [NADP], mitochondrial		MAT1A	S-adenosylmethionine synthase isoform type-1		MINK1	Misshapen-like kinase 1
ZSWIM8	Zinc finger SWIM domain-containing protein 8		RPL32	60S ribosomal protein L32		EEF1D	Elongation factor 1-delta
FUBP3	Far upstream element-binding protein 3		SRFBP1	Serum response factor-binding protein 1		CKAP2	Cytoskeleton-associated protein 2
			RREB1	Ras-responsive element-binding protein 1		FLJ45252	Uncharacterized protein FLJ45252
			IRS4	Insulin receptor substrate 4		TMOD3	Tropomodulin-3
			BCORL1	BCL-6 corepressor-like protein 1		POLA1	DNA polymerase alpha catalytic subunit
			DHX37	Probable ATP-dependent RNA helicase DHX37		NCAPH	Condensin complex subunit 2
			SIX5	Homeobox protein SIX5		CSDE1	Cold shock domain-containing protein E1
			HSD17B12	Estradiol 17-beta-dehydrogenase 12		SH3PXD2B	SH3 and PX domain-containing protein 2B
			COL3A1	Collagen alpha-1(III) chain		USP16	Ubiquitin carboxyl-terminal hydrolase 16
			NOC2L	Nucleolar complex protein 2 homolog		HAUS6	HAUS augmin-like complex subunit 6
			SMC2	Structural maintenance of chromosomes protein 2		SYNE1	Nesprin-1
			TADA2B	Transcriptional adapter 2-beta		XRN1	5'-3' exoribonuclease 1
			THRA	Thyroid hormone receptor alpha		CLCC1	Chloride channel CLIC-like protein 1
			ZNF362	Zinc finger protein 362		CAST	Calpastatin
			ERCC3	TFIIH basal transcription factor complex helicase XPB subunit		SVIL	Supervillin
			HSPA7	Putative heat shock 70 kDa protein 7		NCAPG	Condensin complex subunit 3
			EIF5AL1	Eukaryotic translation initiation factor 5A-1-like		ERLIN2	Erlin-2
			PUS7	Pseudouridylate synthase 7 homolog		SECISBP2	Selenocysteine insertion sequence-binding protein 2
			SSR4	Translocon-associated protein subunit delta		NHLRC2	NHL repeat-containing protein 2
			EHMT2	Histone-lysine N-methyltransferase EHMT2		C1orf122	Uncharacterized protein C1orf122
			DMBT1	Deleted in malignant brain tumors 1 protein		RBM12	RNA-binding protein 12
			SDE2	Protein SDE2 homolog		EIF4G2	Eukaryotic translation initiation factor 4 gamma 2
			FLYWCH2	FLYWCH family member 2		CAMSAP1	Calmodulin-regulated spectrin-associated protein 1
			PARN	Poly(A)-specific ribonuclease PARN		TTF2	Transcription termination factor 2
			RPL35A	60S ribosomal protein L35a		MAP7D3	MAP7 domain-containing protein 3
			MTAP	S-methyl-5'-thioadenosine phosphorylase		CHMP2B	Charged multivesicular body protein 2b
			SPATA5	Spermatogenesis-associated protein 5		DUT	Deoxyuridine 5'-triphosphate nucleotidohydrolase, mitochondrial
			IGHA1	Ig alpha-1 chain C region		SMAP1	Stromal membrane-associated protein 1
			COL4A4	Collagen alpha-4(IV) chain		CCAR1	Cell division cycle and apoptosis regulator protein 1
			CNTNAP3B	Contactin-associated protein-like 3B		TNRC6B	Trinucleotide repeat-containing gene 6B protein
			GSDMA	Gasdermin-A		GIT1	ARF GTPase-activating protein GIT1
			UBTF	Nucleolar transcription factor 1		TPPP	Tubulin polymerization-promoting protein
			XRN2	5'-3' exoribonuclease 2		PFKP	6-phosphofructokinase type C
			ADAMTS14	A disintegrin and metalloproteinase with thrombospondin motifs 14		CAP1	Adenylyl cyclase-associated protein 1
			FGA	Fibrinogen alpha chain		SLC25A1	Tricarboxylate transport protein, mitochondrial
			GRM5	Metabotropic glutamate receptor 5		PDHA1	Pyruvate dehydrogenase E1 component subunit alpha, somatic form, mitochondrial
			AKAP13	A-kinase anchor protein 13		ZFP91	E3 ubiquitin-protein ligase ZFP91
			S100A9	Protein S100-A9		DHX57	Putative ATP-dependent RNA helicase DHX57
			FMN2	Formin-2		SLC25A10	Mitochondrial dicarboxylate carrier
			IL16	Pro-interleukin-16		GCN1L1	Translational activator GCN1
			DHX36	Probable ATP-dependent RNA helicase DHX36		ATXN2L	Ataxin-2-like protein
						CAMSAP3	Calmodulin-regulated spectrin-associated protein 3
						TANC1	Protein TANC1
						PPM1A	Protein phosphatase 1A
						PPM1B	Protein phosphatase 1B
						CYFIP1	Cytoplasmic FMR1-interacting protein 1
						FAM21C	WASH complex subunit FAM21C
						ANKHD1	Ankyrin repeat and KH domain-containing protein 1
						TAF15	TATA-binding protein-associated factor 2N
						SIX3	Homeobox protein SIX3
						FAM213A	Redox-regulatory protein FAM213A
						SHROOM3	Protein Shroom3
						ITGAE	Integrin alpha-E

## Sheet: Shared Three-way
Proteins shared between Ku70-BioID2, Ku70 vWA-BioID2, and Ku70 ∆vWA-BioID2 (n=97)
Gene Name	Full Name
NUMA1	Nuclear mitotic apparatus protein 1
WAPAL	Wings apart-like protein homolog
DVL1	Segment polarity protein dishevelled homolog DVL-1
NIPBL	Nipped-B-like protein
LIN54	Protein lin-54 homolog
DIDO1	Death-inducer obliterator 1
CDKN2AIP	CDKN2A-interacting protein
ANLN	Actin-binding protein anillin
SF3A1	Splicing factor 3A subunit 1
TPR	Nucleoprotein TPR
PCF11	Pre-mRNA cleavage complex 2 protein Pcf11
NKAP	NF-kappa-B-activating protein
KIF23	Kinesin-like protein KIF23
POTEKP	Putative beta-actin-like protein 3
SMEK1	Serine/threonine-protein phosphatase 4 regulatory subunit 3A
KDM3B	Lysine-specific demethylase 3B
SF1	Splicing factor 1
PRRC2A	Protein PRRC2A
MSH2	DNA mismatch repair protein Msh2
ZNF318	Zinc finger protein 318
TOX4	TOX high mobility group box family member 4
ZC3H14	Zinc finger CCCH domain-containing protein 14
FUBP1	Far upstream element-binding protein 1
FAM50B	Protein FAM50B
ZMYND8	Protein kinase C-binding protein 1
NANS	Sialic acid synthase
WDHD1	WD repeat and HMG-box DNA-binding protein 1
ERCC5	DNA repair protein complementing XP-G cells
IWS1	Protein IWS1 homolog
RPRD2	Regulation of nuclear pre-mRNA domain-containing protein 2
CDK11A	Cyclin-dependent kinase 11A
GTF2F1	General transcription factor IIF subunit 1
ST13P4	Putative protein FAM10A4
ST13	Hsc70-interacting protein
RBM26	RNA-binding protein 26
EMSY	Protein EMSY
CUL4B	Cullin-4B
CUL3	Cullin-3
DGCR14	Protein DGCR14
PDIA4	Protein disulfide-isomerase A4
ORC3	Origin recognition complex subunit 3
AGFG1	Arf-GAP domain and FG repeat-containing protein 1
RP1BL	Ras-related protein Rap-1b-like protein
SMARCA2	Probable global transcription activator SNF2L2
GPATCH8	G patch domain-containing protein 8
NELFA	Negative elongation factor A
NUSAP1	Nucleolar and spindle-associated protein 1
SLC4A1AP	Kanadaptin
SPAG7	Sperm-associated antigen 7
PDHB	Pyruvate dehydrogenase E1 component subunit beta, mitochondrial
ZNF503	Zinc finger protein 503
BRIP1	Fanconi anemia group J protein
RTN4	Reticulon-4
ZBTB21	Zinc finger and BTB domain-containing protein 21
SEPT9	Septin-9
PZP	Pregnancy zone protein
A2M	Alpha-2-macroglobulin
GGCT	Gamma-glutamylcyclotransferase
TAGLN3	Transgelin-3
CSRP1	Cysteine and glycine-rich protein 1
CASC5	Protein CASC5
STAG2	Cohesin subunit SA-2
SRSF2	Serine/arginine-rich splicing factor 2
PDCD4	Programmed cell death protein 4
CDK7	Cyclin-dependent kinase 7
NBEA	Neurobeachin
TRIM25	E3 ubiquitin/ISG15 ligase TRIM25
DDX1	ATP-dependent RNA helicase DDX1
ANP32C	Acidic leucine-rich nuclear phosphoprotein 32 family member C
GTF2A1	Transcription initiation factor IIA subunit 1
USP31	Ubiquitin carboxyl-terminal hydrolase 31
TGM1	Protein-glutamine gamma-glutamyltransferase K
HIST3H2BB	Histone H2B type 3-B
LYZ	Lysozyme C
C1orf174	UPF0688 protein C1orf174
CDC40	Pre-mRNA-processing factor 17
SNCA	Alpha-synuclein
PSMA8	Proteasome subunit alpha type-7-like
PSMA7	Proteasome subunit alpha type-7
ARL6IP4	ADP-ribosylation factor-like protein 6-interacting protein 4
PIH1D1	PIH1 domain-containing protein 1
C12orf23	UPF0444 transmembrane protein C12orf23
HSPH1	Heat shock protein 105 kDa
AZGP1	Zinc-alpha-2-glycoprotein
MASTL	Serine/threonine-protein kinase greatwall
NR3C1	Glucocorticoid receptor
DIS3	Exosome complex exonuclease RRP44
SUGT1	Suppressor of G2 allele of SKP1 homolog
PIN1	Peptidyl-prolyl cis-trans isomerase NIMA-interacting 1
NUCKS1	Nuclear ubiquitous casein and cyclin-dependent kinase substrate 1
EDRF1	Erythroid differentiation-related factor 1
GMPS	GMP synthase [glutamine-hydrolyzing]
SRP68	Signal recognition particle subunit SRP68
PRPF3	U4/U6 small nuclear ribonucleoprotein Prp3
ARF4	ADP-ribosylation factor 4
RDX	Radixin
MAST3	Microtubule-associated serine/threonine-protein kinase 3
