# Supplementary material for: Identification of Ku70 Domain-Specific Interactors Using BioID2
Source: Cells. 2021 Mar 14;10(3):646. doi: 10.3390/cells10030646 (PMC8001828; doi:10.3390/cells10030646)
Supplement: Supplementary file 1 [file cells-10-00646-s001.zip › Table S2 - Comparing filtered BioID2 candidates appearing in two or more replicates.xlsx]

## Sheet: Construct-specific
Ku70-BioID2-specific proteins (n=36)			Ku70 vWA-BioID2-specific proteins (n=163)			Ku70 ∆vWA-BioID2-specific proteins (n=30)
Gene Name	Full Name		Gene Name	Full Name		Gene Name	Full Name
MSH2	DNA mismatch repair protein Msh2		C10orf118	Uncharacterized protein C10orf118		MGME1	Mitochondrial genome maintenance exonuclease 1
TFAP2E	Transcription factor AP-2-epsilon		PRKAR2A	cAMP-dependent protein kinase type II-alpha regulatory subunit		CAMSAP1	Calmodulin-regulated spectrin-associated protein 1
TFAP2B	Transcription factor AP-2-beta		EHBP1	EH domain-binding protein 1		RPL35A	60S ribosomal protein L35a
PRPF38B	Pre-mRNA-splicing factor 38B		GLO1	Lactoylglutathione lyase		HSPE1	10 kDa heat shock protein, mitochondrial
ACTBL2	Beta-actin-like protein 2		ZMYND8	Protein kinase C-binding protein 1		SRP68	Signal recognition particle subunit SRP68
TUBB6	Tubulin beta-6 chain		CDC42BPA	Serine/threonine-protein kinase MRCK alpha		TAGLN3	Transgelin-3
CHD3	Chromodomain-helicase-DNA-binding protein 3		DIP2B	Disco-interacting protein 2 homolog B		POGZ	Pogo transposable element with ZNF domain
POTEKP	Putative beta-actin-like protein 3		BICD2	Protein bicaudal D homolog 2		FARSB	Phenylalanine--tRNA ligase beta subunit
WDR33	pre-mRNA 3' end processing protein WDR33		ABR	Active breakpoint cluster region-related protein		DDX31	Probable ATP-dependent RNA helicase DDX31
DGCR8	Microprocessor complex subunit DGCR8		MAVS	Mitochondrial antiviral-signaling protein		AK3	GTP:AMP phosphotransferase AK3, mitochondrial
NANS	Sialic acid synthase		MACF1	Microtubule-actin cross-linking factor 1, isoforms 1/2/3/5		PARN	Poly(A)-specific ribonuclease PARN
NOL11	Nucleolar protein 11		NEDD1	Protein NEDD1		MAP7D3	MAP7 domain-containing protein 3
RSF1	Remodeling and spacing factor 1		CCDC85C	Coiled-coil domain-containing protein 85C		RNMTL1	RNA methyltransferase-like protein 1
RAB8A	Ras-related protein Rab-8A		TPD52L2	Tumor protein D54		NDUFAF5	NADH dehydrogenase [ubiquinone] 1 alpha subcomplex assembly factor 5
RAB8B	Ras-related protein Rab-8B		PIPSL	Putative PIP5K1A and PSMD4-like protein		SKOR1	SKI family transcriptional corepressor 1
RAB35	Ras-related protein Rab-35		PSME1	Proteasome activator complex subunit 1		ANKHD1	Ankyrin repeat and KH domain-containing protein 1
RAB15	Ras-related protein Rab-15		WAC	WW domain-containing adapter protein with coiled-coil		FAM50B	Protein FAM50B
RAB13	Ras-related protein Rab-13		DYNC1LI2	Cytoplasmic dynein 1 light intermediate chain 2		PSMA7	Proteasome subunit alpha type-7
WIZ	Protein Wiz		PIH1D1	PIH1 domain-containing protein 1		PSMA8	Proteasome subunit alpha type-7-like
GPATCH8	G patch domain-containing protein 8		ARHGEF16	Rho guanine nucleotide exchange factor 16		KLHDC10	Kelch domain-containing protein 10
NUFIP1	Nuclear fragile X mental retardation-interacting protein 1		CARD11	Caspase recruitment domain-containing protein 11		SRSF2	Serine/arginine-rich splicing factor 2
SLC4A1AP	Kanadaptin		RTN4	Reticulon-4		SLC25A1	Tricarboxylate transport protein, mitochondrial
THUMPD1	THUMP domain-containing protein 1		AGFG1	Arf-GAP domain and FG repeat-containing protein 1		TUBA1A	Tubulin alpha-1A chain
ZC3H8	Zinc finger CCCH domain-containing protein 8		LIN54	Protein lin-54 homolog		HSPA7	Putative heat shock 70 kDa protein 7
MAT1A	S-adenosylmethionine synthase isoform type-1		EPS15L1	Epidermal growth factor receptor substrate 15-like 1		DVL1P1	Putative segment polarity protein dishevelled homolog DVL1P1
HIST3H2BB	Histone H2B type 3-B		SYNJ1	Synaptojanin-1		ECHDC1	Ethylmalonyl-CoA decarboxylase
ALOXE3	Hydroperoxide isomerase ALOXE3		ARCN1	Coatomer subunit delta		NBEA	Neurobeachin
HAL	Histidine ammonia-lyase		CSRP1	Cysteine and glycine-rich protein 1		GLS	Glutaminase kidney isoform, mitochondrial
GSDMA	Gasdermin-A		FAM192A	Protein FAM192A		CSNK1A1L	Casein kinase I isoform alpha-like
TFAP2C	Transcription factor AP-2 gamma		EPB41	Protein 4.1		ITGAE	Integrin alpha-E
TFAP2D	Transcription factor AP-2-delta		NFATC2IP	NFATC2-interacting protein
ZNF207	Zinc finger protein 207		ZNF830	Zinc finger protein 830
ADAMTS14	A disintegrin and metalloproteinase with thrombospondin motifs 14		NR3C1	Glucocorticoid receptor
PPP1CB	Serine/threonine-protein phosphatase PP1-beta catalytic subunit		LSM14A	Protein LSM14 homolog A
PHF8	Histone lysine demethylase PHF8		CLINT1	Clathrin interactor 1
PDHB	Pyruvate dehydrogenase E1 component subunit beta, mitochondrial		SNCA	Alpha-synuclein
			PAK4	Serine/threonine-protein kinase PAK 4
			MAPT	Microtubule-associated protein tau
			FMR1	Fragile X mental retardation protein 1
			EMSY	Protein EMSY
			ASAP1	Arf-GAP with SH3 domain, ANK repeat and PH domain-containing protein 1
			RPAP3	RNA polymerase II-associated protein 3
			BCR	Breakpoint cluster region protein
			STIP1	Stress-induced-phosphoprotein 1
			SH3D19	SH3 domain-containing protein 19
			NDE1	Nuclear distribution protein nudE homolog 1
			NDEL1	Nuclear distribution protein nudE-like 1
			SPDL1	Protein Spindly
			PLEKHA1	Pleckstrin homology domain-containing family A member 1
			SIKE1	Suppressor of IKBKE 1
			RAPGEF6	Rap guanine nucleotide exchange factor 6
			ZNF318	Zinc finger protein 318
			SLK	STE20-like serine/threonine-protein kinase
			DPYSL2	Dihydropyrimidinase-related protein 2
			PPP1R12A	Protein phosphatase 1 regulatory subunit 12A
			AP3S1	AP-3 complex subunit sigma-1
			RFX5	DNA-binding protein RFX5
			EML4	Echinoderm microtubule-associated protein-like 4
			PDCL3	Phosducin-like protein 3
			SNX3	Sorting nexin-3
			TAOK3	Serine/threonine-protein kinase TAO3
			TAOK1	Serine/threonine-protein kinase TAO1
			SHOX2	Short stature homeobox protein 2
			SORBS1	Sorbin and SH3 domain-containing protein 1
			CDKN2AIP	CDKN2A-interacting protein
			TBCE	Tubulin-specific chaperone E
			GIGYF2	PERQ amino acid-rich with GYF domain-containing protein 2
			DNAJC17	DnaJ homolog subfamily C member 17
			DNM3	Dynamin-3
			TXLNA	Alpha-taxilin
			STX5	Syntaxin-5
			DRG2	Developmentally-regulated GTP-binding protein 2
			RNF113A	RING finger protein 113A
			WDHD1	WD repeat and HMG-box DNA-binding protein 1
			ANKZF1	Ankyrin repeat and zinc finger domain-containing protein 1
			API5	Apoptosis inhibitor 5
			PZP	Pregnancy zone protein
			A2M	Alpha-2-macroglobulin
			NCOA7	Nuclear receptor coactivator 7
			ENSA	Alpha-endosulfine
			EIF5	Eukaryotic translation initiation factor 5
			ATXN3	Ataxin-3
			ERBB2IP	Protein LAP2
			PIAS3	E3 SUMO-protein ligase PIAS3
			ERCC6L	DNA excision repair protein ERCC-6-like
			LCP1	Plastin-2
			TFCP2	Alpha-globin transcription factor CP2
			PDIA4	Protein disulfide-isomerase A4
			ANK3	Ankyrin-3
			CTPS1	CTP synthase 1
			EEF1B2	Elongation factor 1-beta
			LMO7	LIM domain only protein 7
			BRCA1	Breast cancer type 1 susceptibility protein
			MYBL2	Myb-related protein B
			ZYX	Zyxin
			LZIC	Protein LZIC
			FOXJ3	Forkhead box protein J3
			DIS3	Exosome complex exonuclease RRP44
			POLA1	DNA polymerase alpha catalytic subunit
			RAB27A	Ras-related protein Rab-27A
			SH3PXD2B	SH3 and PX domain-containing protein 2B
			PRRC2B	Protein PRRC2B
			SSFA2	Sperm-specific antigen 2
			CRMP1	Dihydropyrimidinase-related protein 1
			NDUFA4	NADH dehydrogenase [ubiquinone] 1 alpha subcomplex subunit 4
			ANXA5	Annexin A5
			HSPH1	Heat shock protein 105 kDa
			PYGL	Glycogen phosphorylase, liver form
			SVIL	Supervillin
			GRIP1	Glutamate receptor-interacting protein 1
			NHLRC2	NHL repeat-containing protein 2
			TGM1	Protein-glutamine gamma-glutamyltransferase K
			KHDRBS1	KH domain-containing, RNA-binding, signal transduction-associated protein 1
			RBM12	RNA-binding protein 12
			ZDBF2	DBF4-type zinc finger-containing protein 2
			WRAP53	Telomerase Cajal body protein 1
			TTF2	Transcription termination factor 2
			MAX	Protein max
			EPN3	Epsin-3
			EPN2	Epsin-2
			GIT1	ARF GTPase-activating protein GIT1
			DGCR14	Protein DGCR14
			IGBP1	Immunoglobulin-binding protein 1
			TPPP	Tubulin polymerization-promoting protein
			ZBTB21	Zinc finger and BTB domain-containing protein 21
			SP100	Nuclear autoantigen Sp-100
			SP140L	Nuclear body protein SP140-like protein
			COPZ1	Coatomer subunit zeta-1
			LUZP1	Leucine zipper protein 1
			CALM1	Calmodulin
			URB1	Nucleolar pre-ribosomal-associated protein 1
			PVRL2	Poliovirus receptor-related protein 2
			ABL2	Abelson tyrosine-protein kinase 2
			CCAR2	Cell cycle and apoptosis regulator protein 2
			PPM1A	Protein phosphatase 1A
			FAM21A	WASH complex subunit FAM21A
			ZNF687	Zinc finger protein 687
			TMEM57	Macoilin
			FAM169A	Soluble lamin-associated protein of 75 kDa
			LYZ	Lysozyme C
			GOT2	Aspartate aminotransferase, mitochondrial
			PYGB	Glycogen phosphorylase, brain form
			ABLIM1	Actin-binding LIM protein 1
			MCM4	DNA replication licensing factor MCM4
			YTHDF2	YTH domain family protein 2
			CUEDC2	CUE domain-containing protein 2
			OCRL	Inositol polyphosphate 5-phosphatase OCRL-1
			STUB1	E3 ubiquitin-protein ligase CHIP
			STAT1	Signal transducer and activator of transcription 1-alpha/beta
			EDC4	Enhancer of mRNA-decapping protein 4
			STAG3	Cohesin subunit SA-3
			BAZ2B	Bromodomain adjacent to zinc finger domain protein 2B
			BRIP1	Fanconi anemia group J protein
			CKAP5	Cytoskeleton-associated protein 5
			FNBP4	Formin-binding protein 4
			RBMS2	RNA-binding motif, single-stranded-interacting protein 2
			ARPIN	Arpin
			ARPC5	Actin-related protein 2/3 complex subunit 5
			C17orf85	Uncharacterized protein C17orf85
			ATE1	Arginyl-tRNA--protein transferase 1
			C19orf12	Protein C19orf12
			SARS	Serine--tRNA ligase, cytoplasmic
			USP33	Ubiquitin carboxyl-terminal hydrolase 33

## Sheet: Shared Two-way
Proteins shared between Ku70-BioID2 and Ku70 vWA-BioID2 (n=28)			Proteins shared between Ku70-BioID2 and Ku70 ∆vWA-BioID2 (n=10)			Proteins shared between Ku70 vWA-BioID2 and Ku70 ∆vWA-BioID2 (n=23)
Gene Name	Full Name		Gene Name	Full Name		Gene Name	Full Name
CCNT2	Cyclin-T2		ZFR	Zinc finger RNA-binding protein		DBNL	Drebrin-like protein
SMEK1	Serine/threonine-protein phosphatase 4 regulatory subunit 3A		STRBP	Spermatid perinuclear RNA-binding protein		PALLD	Palladin
SF1	Splicing factor 1		APLF	Aprataxin and PNK-like factor		APBB1	Amyloid beta A4 precursor protein-binding family B member 1
FUBP1	Far upstream element-binding protein 1		WRN	Werner syndrome ATP-dependent helicase		AKAP1	A-kinase anchor protein 1, mitochondrial
RP1BL	Ras-related protein Rap-1b-like protein		NKRF	NF-kappa-B-repressing factor		IST1	IST1 homolog
ANP32C	Acidic leucine-rich nuclear phosphoprotein 32 family member C		SEPT9	Septin-9		ARL6IP4	ADP-ribosylation factor-like protein 6-interacting protein 4
WAPAL	Wings apart-like protein homolog		ASPM	Abnormal spindle-like microcephaly-associated protein		C1orf174	UPF0688 protein C1orf174
DIDO1	Death-inducer obliterator 1		COL3A1	Collagen alpha-1(III) chain		TIGAR	Fructose-2,6-bisphosphatase TIGAR
YLPM1	YLP motif-containing protein 1		EIF5AL1	Eukaryotic translation initiation factor 5A-1-like		GEMIN5	Gem-associated protein 5
ANLN	Actin-binding protein anillin		ZNF503	Zinc finger protein 503		RANBP1	Ran-specific GTPase-activating protein
SF3A1	Splicing factor 3A subunit 1					IFT74	Intraflagellar transport protein 74 homolog
PCF11	Pre-mRNA cleavage complex 2 protein Pcf11					NUFIP2	Nuclear fragile X mental retardation-interacting protein 2
KIF23	Kinesin-like protein KIF23					TXLNG	Gamma-taxilin
KDM3B	Lysine-specific demethylase 3B					AAK1	AP2-associated protein kinase 1
ZC3H14	Zinc finger CCCH domain-containing protein 14					MAP4K4	Mitogen-activated protein kinase kinase kinase kinase 4
RPRD2	Regulation of nuclear pre-mRNA domain-containing protein 2					XRN1	5'-3' exoribonuclease 1
GPATCH11	G patch domain-containing protein 11					DUT	Deoxyuridine 5'-triphosphate nucleotidohydrolase, mitochondrial
CUL3	Cullin-3					UACA	Uveal autoantigen with coiled-coil domains and ankyrin repeats
SPAG7	Sperm-associated antigen 7					MTMR12	Myotubularin-related protein 12
MAGOH	Protein mago nashi homolog					GTF2F1	General transcription factor IIF subunit 1
MAGOHB	Protein mago nashi homolog 2					GKAP1	G kinase-anchoring protein 1
CIAPIN1	Anamorsin					DNAJC2	DnaJ homolog subfamily C member 2
NT5DC1	5'-nucleotidase domain-containing protein 1					EGLN1	Egl nine homolog 1
PDCD4	Programmed cell death protein 4
CDK7	Cyclin-dependent kinase 7
ALKBH5	RNA demethylase ALKBH5
XYLT1	Xylosyltransferase 1
EDRF1	Erythroid differentiation-related factor 1

## Sheet: Shared Three-way
Proteins shared between Ku70-BioID2, Ku70 vWA-BioID2, and Ku70 ∆vWA-BioID2 (n=9)
Gene Name	Full Name
CDK11A	Cyclin-dependent kinase 11A
GTF2A1	Transcription initiation factor IIA subunit 1
DVL1	Segment polarity protein dishevelled homolog DVL-1
NIPBL	Nipped-B-like protein
PRRC2A	Protein PRRC2A
CUL4B	Cullin-4B
NELFA	Negative elongation factor A
TRIM25	E3 ubiquitin/ISG15 ligase TRIM25
C12orf23	UPF0444 transmembrane protein C12orf23
