# Supplementary material for: Identification of Ku70 Domain-Specific Interactors Using BioID2
Source: Cells. 2021 Mar 14;10(3):646. doi: 10.3390/cells10030646 (PMC8001828; doi:10.3390/cells10030646)
Supplement: Supplementary file 1 [file cells-10-00646-s001.zip › Table S3 - Comparing filtered BioID2 candidates appearing in three replicates.xlsx]

## Sheet: Construct-specific
Ku70-BioID2-specific proteins (n=8)			Ku70 vWA-BioID2-specific proteins (n=103)			Ku70 ∆vWA-BioID2-specific proteins (n=11)
Gene Name	Full Name		Gene Name	Full Name		Gene Name	Full Name
STRBP	Spermatid perinuclear RNA-binding protein		C10orf118	Uncharacterized protein C10orf118		WRN	Werner syndrome ATP-dependent helicase
CCNT2	Cyclin-T2		PRKAR2A	cAMP-dependent protein kinase type II-alpha regulatory subunit		NKRF	NF-kappa-B-repressing factor
MSH2	DNA mismatch repair protein Msh2		EHBP1	EH domain-binding protein 1		DUT	Deoxyuridine 5'-triphosphate nucleotidohydrolase, mitochondrial
FUBP1	Far upstream element-binding protein 1		GLO1	Lactoylglutathione lyase		MGME1	Mitochondrial genome maintenance exonuclease 1
TFAP2E	Transcription factor AP-2-epsilon		ZMYND8	Protein kinase C-binding protein 1		CAMSAP1	Calmodulin-regulated spectrin-associated protein 1
TFAP2B	Transcription factor AP-2-beta		APBB1	Amyloid beta A4 precursor protein-binding family B member 1		CUL4B	Cullin-4B
RP1BL	Ras-related protein Rap-1b-like protein		CDC42BPA	Serine/threonine-protein kinase MRCK alpha		RPL35A	60S ribosomal protein L35a
PRPF38B	Pre-mRNA-splicing factor 38B		YLPM1	YLP motif-containing protein 1		HSPE1	10 kDa heat shock protein, mitochondrial
			DIP2B	Disco-interacting protein 2 homolog B		ASPM	Abnormal spindle-like microcephaly-associated protein
			BICD2	Protein bicaudal D homolog 2		GKAP1	G kinase-anchoring protein 1
			AKAP1	A-kinase anchor protein 1, mitochondrial		DNAJC2	DnaJ homolog subfamily C member 2
			ABR	Active breakpoint cluster region-related protein
			IST1	IST1 homolog
			MAVS	Mitochondrial antiviral-signaling protein
			MACF1	Microtubule-actin cross-linking factor 1, isoforms 1/2/3/5
			NEDD1	Protein NEDD1
			CCDC85C	Coiled-coil domain-containing protein 85C
			TPD52L2	Tumor protein D54
			PIPSL	Putative PIP5K1A and PSMD4-like protein
			PSME1	Proteasome activator complex subunit 1
			WAC	WW domain-containing adapter protein with coiled-coil
			DYNC1LI2	Cytoplasmic dynein 1 light intermediate chain 2
			PIH1D1	PIH1 domain-containing protein 1
			PDCD4	Programmed cell death protein 4
			CUL3	Cullin-3
			ARL6IP4	ADP-ribosylation factor-like protein 6-interacting protein 4
			ARHGEF16	Rho guanine nucleotide exchange factor 16
			RPRD2	Regulation of nuclear pre-mRNA domain-containing protein 2
			CARD11	Caspase recruitment domain-containing protein 11
			RTN4	Reticulon-4
			PCF11	Pre-mRNA cleavage complex 2 protein Pcf11
			AGFG1	Arf-GAP domain and FG repeat-containing protein 1
			LIN54	Protein lin-54 homolog
			C1orf174	UPF0688 protein C1orf174
			KIF23	Kinesin-like protein KIF23
			PRRC2A	Protein PRRC2A
			EPS15L1	Epidermal growth factor receptor substrate 15-like 1
			TIGAR	Fructose-2,6-bisphosphatase TIGAR
			SYNJ1	Synaptojanin-1
			ARCN1	Coatomer subunit delta
			CSRP1	Cysteine and glycine-rich protein 1
			FAM192A	Protein FAM192A
			CDK7	Cyclin-dependent kinase 7
			EPB41	Protein 4.1
			WAPAL	Wings apart-like protein homolog
			NFATC2IP	NFATC2-interacting protein
			ZNF830	Zinc finger protein 830
			NR3C1	Glucocorticoid receptor
			LSM14A	Protein LSM14 homolog A
			CLINT1	Clathrin interactor 1
			SNCA	Alpha-synuclein
			PAK4	Serine/threonine-protein kinase PAK 4
			MAPT	Microtubule-associated protein tau
			FMR1	Fragile X mental retardation protein 1
			EMSY	Protein EMSY
			ASAP1	Arf-GAP with SH3 domain, ANK repeat and PH domain-containing protein 1
			RPAP3	RNA polymerase II-associated protein 3
			BCR	Breakpoint cluster region protein
			STIP1	Stress-induced-phosphoprotein 1
			ALKBH5	RNA demethylase ALKBH5
			SH3D19	SH3 domain-containing protein 19
			NDE1	Nuclear distribution protein nudE homolog 1
			NDEL1	Nuclear distribution protein nudE-like 1
			SPDL1	Protein Spindly
			PLEKHA1	Pleckstrin homology domain-containing family A member 1
			SIKE1	Suppressor of IKBKE 1
			ZC3H14	Zinc finger CCCH domain-containing protein 14
			NUFIP2	Nuclear fragile X mental retardation-interacting protein 2
			RAPGEF6	Rap guanine nucleotide exchange factor 6
			ZNF318	Zinc finger protein 318
			SLK	STE20-like serine/threonine-protein kinase
			DPYSL2	Dihydropyrimidinase-related protein 2
			PPP1R12A	Protein phosphatase 1 regulatory subunit 12A
			AP3S1	AP-3 complex subunit sigma-1
			RFX5	DNA-binding protein RFX5
			EML4	Echinoderm microtubule-associated protein-like 4
			PDCL3	Phosducin-like protein 3
			ANLN	Actin-binding protein anillin
			SNX3	Sorting nexin-3
			TAOK3	Serine/threonine-protein kinase TAO3
			TAOK1	Serine/threonine-protein kinase TAO1
			SHOX2	Short stature homeobox protein 2
			SORBS1	Sorbin and SH3 domain-containing protein 1
			CDKN2AIP	CDKN2A-interacting protein
			TBCE	Tubulin-specific chaperone E
			GIGYF2	PERQ amino acid-rich with GYF domain-containing protein 2
			DNAJC17	DnaJ homolog subfamily C member 17
			DNM3	Dynamin-3
			TXLNA	Alpha-taxilin
			STX5	Syntaxin-5
			DRG2	Developmentally-regulated GTP-binding protein 2
			RNF113A	RING finger protein 113A
			WDHD1	WD repeat and HMG-box DNA-binding protein 1
			ANKZF1	Ankyrin repeat and zinc finger domain-containing protein 1
			API5	Apoptosis inhibitor 5
			PZP	Pregnancy zone protein
			A2M	Alpha-2-macroglobulin
			NCOA7	Nuclear receptor coactivator 7
			AAK1	AP2-associated protein kinase 1
			ENSA	Alpha-endosulfine
			EIF5	Eukaryotic translation initiation factor 5
			ATXN3	Ataxin-3
			MAP4K4	Mitogen-activated protein kinase kinase kinase kinase 4

## Sheet: Shared Two-way
Proteins shared between Ku70-BioID2 and Ku70 vWA-BioID2 (n=5)			Proteins shared between Ku70-BioID2 and Ku70 ∆vWA-BioID2 (n=2)			Proteins shared between Ku70 vWA-BioID2 and Ku70 ∆vWA-BioID2 (n=8)
Gene Name	Full Name		Gene Name	Full Name		Gene Name	Full Name
SMEK1	Serine/threonine-protein phosphatase 4 regulatory subunit 3A		ZFR	Zinc finger RNA-binding protein		DBNL	Drebrin-like protein
SF1	Splicing factor 1		APLF	Aprataxin and PNK-like factor		PALLD	Palladin
CDK11A	Cyclin-dependent kinase 11A					GEMIN5	Gem-associated protein 5
ANP32C	Acidic leucine-rich nuclear phosphoprotein 32 family member C					RANBP1	Ran-specific GTPase-activating protein
GTF2A1	Transcription initiation factor IIA subunit 1					DVL1	Segment polarity protein dishevelled homolog DVL-1
						TRIM25	E3 ubiquitin/ISG15 ligase TRIM25
						IFT74	Intraflagellar transport protein 74 homolog
						TXLNG	Gamma-taxilin

## Sheet: Shared Three-way
Proteins shared between Ku70-BioID2, Ku70 vWA-BioID2, and Ku70 ∆vWA-BioID2 (n=0)
Gene Name	Full Name
