# Supplementary material for: Identification of Ku70 Domain-Specific Interactors Using BioID2
Source: Cells. 2021 Mar 14;10(3):646. doi: 10.3390/cells10030646 (PMC8001828; doi:10.3390/cells10030646)
Supplement: Supplementary file 1 [file cells-10-00646-s001.zip › Table S4 - Ku70 vWA- and delta vWA-specific BioID2 candidates.xlsx]

## Sheet: Ku70 vWA-specific
Table S4. Ku70 vWA-specific BioID2 candidates (n=63)
Gene Name	Full Name	# of Replicates
YLPM1	YLP motif-containing protein 1	3
WAC	WW domain-containing adapter protein with coiled-coil	3
FAM192A	Protein FAM192A	3
NFATC2IP	NFATC2-interacting protein	3
ZNF830	Zinc finger protein 830	3
ALKBH5	RNA demethylase ALKBH5	3
API5	Apoptosis inhibitor 5	3
SPDL1	Protein Spindly	3
RFX5	DNA-binding protein RFX5	3
RNF113A	RING finger protein 113A	3
SHOX2	Short stature homeobox protein 2	3
CCNT2	Cyclin-T2	2
GPATCH11	G patch domain-containing protein 11	2
CIAPIN1	Anamorsin	2
CCAR2	Cell cycle and apoptosis regulator protein 2	2
NT5DC1	5'-nucleotidase domain-containing protein 1	2
ANXA5	Annexin A5	2
KHDRBS1	KH domain-containing, RNA-binding, signal transduction-associated protein 1	2
C17orf85	Uncharacterized protein C17orf85	2
MAGOH	Protein mago nashi homolog	2
MAGOHB	Protein mago nashi homolog 2	2
CALM1	Calmodulin	2
XYLT1	Xylosyltransferase 1	2
KIAA1143	Uncharacterized protein KIAA1143	1
DDX41	Probable ATP-dependent RNA helicase DDX41	1
TFAP2C	Transcription factor AP-2 gamma	1
TFAP2D	Transcription factor AP-2-delta	1
RGS14	Regulator of G-protein signaling 14	1
ZNF207	Zinc finger protein 207	1
VCPIP1	Deubiquitinating protein VCIP135	1
CCDC18	Coiled-coil domain-containing protein 18	1
RNMT	mRNA cap guanine-N7 methyltransferase	1
UCHL1	Ubiquitin carboxyl-terminal hydrolase isozyme L1	1
IDH2	Isocitrate dehydrogenase [NADP], mitochondrial	1
ZSWIM8	Zinc finger SWIM domain-containing protein 8	1
FUBP3	Far upstream element-binding protein 3	1
TP53BP1	Tumor suppressor p53-binding protein 1	1
MORC2	MORC family CW-type zinc finger protein 2	1
PHF8	Histone lysine demethylase PHF8	1
PGAM1	Phosphoglycerate mutase 1	1
CIC	Protein capicua homolog	1
DNAJA1	DnaJ homolog subfamily A member 1	1
TFAP2E	Transcription factor AP-2-epsilon	1
TFAP2B	Transcription factor AP-2-beta	1
NMT2	Glycylpeptide N-tetradecanoyltransferase 2	1
MGC87657	Putative 60S ribosomal protein L13a-like MGC87657	1
ASPH	Aspartyl/asparaginyl beta-hydroxylase	1
SRSF12	Serine/arginine-rich splicing factor 12	1
BRD4	Bromodomain-containing protein 4	1
BOD1L1	Biorientation of chromosomes in cell division protein 1-like 1	1
NR2C2	Nuclear receptor subfamily 2 group C member 2	1
SRSF8	Serine/arginine-rich splicing factor 8	1
FLG	Filaggrin	1
SLAIN2	SLAIN motif-containing protein 2	1
S100A11	Protein S100-A11	1
PSMC5	26S protease regulatory subunit 8	1
PIWIL3	Piwi-like protein 3	1
RANBP3	Ran-binding protein 3	1
HAL	Histidine ammonia-lyase	1
DCP2	m7GpppN-mRNA hydrolase	1
HIRIP3	HIRA-interacting protein 3	1
COL17A1	Collagen alpha-1(XVII) chain	1
COL23A1	Collagen alpha-1(XXIII) chain	1

## Sheet: Ku70 delta vWA-specific
Table S4. Ku70 delta vWA-specific BioID2 candidates
Gene Name	Full Name	# of Replicates
WRN	Werner syndrome ATP-dependent helicase	3
NKRF	NF-kappa-B-repressing factor	3
APLF	Aprataxin and PNK-like factor	3
ZFR	Zinc finger RNA-binding protein	3
RPL35A	60S ribosomal protein L35a	3
HSPE1	10 kDa heat shock protein, mitochondrial	3
ASPM	Abnormal spindle-like microcephaly-associated protein	3
STRBP	Spermatid perinuclear RNA-binding protein	2
COL3A1	Collagen alpha-1(III) chain	2
HSPA7	Putative heat shock 70 kDa protein 7	2
EIF5AL1	Eukaryotic translation initiation factor 5A-1-like	2
PARN	Poly(A)-specific ribonuclease PARN	2
TUBB6	Tubulin beta-6 chain	1
CHD3	Chromodomain-helicase-DNA-binding protein 3	1
KIAA1429	Protein virilizer homolog	1
NASP	Nuclear autoantigenic sperm protein	1
ARID1B	AT-rich interactive domain-containing protein 1B	1
CDK13	Cyclin-dependent kinase 13	1
USP42	Ubiquitin carboxyl-terminal hydrolase 42	1
MRPS31	28S ribosomal protein S31, mitochondrial	1
TRPS1	Zinc finger transcription factor Trps1	1
MRPS9	28S ribosomal protein S9, mitochondrial	1
TPM3L	Putative tropomyosin alpha-3 chain-like protein	1
SALL2	Sal-like protein 2	1
ZNF518B	Zinc finger protein 518B	1
GTF3C1	General transcription factor 3C polypeptide 1	1
DGCR8	Microprocessor complex subunit DGCR8	1
SAP18	Histone deacetylase complex subunit SAP18	1
RPS11	40S ribosomal protein S11	1
SLC25A13	Calcium-binding mitochondrial carrier protein Aralar2	1
POLD3	DNA polymerase delta subunit 3	1
ELAC2	Zinc phosphodiesterase ELAC protein 2	1
CUX1	Homeobox protein cut-like 1	1
C1QBP	Complement component 1 Q subcomponent-binding protein, mitochondrial	1
TFIP11	Tuftelin-interacting protein 11	1
CPSF6	Cleavage and polyadenylation specificity factor subunit 6	1
NOL11	Nucleolar protein 11	1
RSF1	Remodeling and spacing factor 1	1
DES	Desmin	1
AURKAIP1	Aurora kinase A-interacting protein	1
MRPS18B	28S ribosomal protein S18b, mitochondrial	1
SNRPF	Small nuclear ribonucleoprotein F	1
WIZ	Protein Wiz	1
ZNF148	Zinc finger protein 148	1
MBD3	Methyl-CpG-binding domain protein 3	1
MRPS35	28S ribosomal protein S35, mitochondrial	1
SRPK1	SRSF protein kinase 1	1
RACGAP1	Rac GTPase-activating protein 1	1
EIF4A2	Eukaryotic initiation factor 4A-II	1
MRPS24	28S ribosomal protein S24, mitochondrial	1
ZMYM2	Zinc finger MYM-type protein 2	1
FLOT1	Flotillin-1	1
CCDC71	Coiled-coil domain-containing protein 71	1
CTBP2	C-terminal-binding protein 2	1
AP2M1	AP-2 complex subunit mu	1
RPS15A	40S ribosomal protein S15a	1
CDIPT	CDP-diacylglycerol--inositol 3-phosphatidyltransferase	1
RPL10	60S ribosomal protein L10	1
ATP5L	ATP synthase subunit g, mitochondrial	1
MAT1A	S-adenosylmethionine synthase isoform type-1	1
RPL32	60S ribosomal protein L32	1
SRFBP1	Serum response factor-binding protein 1	1
RREB1	Ras-responsive element-binding protein 1	1
IRS4	Insulin receptor substrate 4	1
BCORL1	BCL-6 corepressor-like protein 1	1
DHX37	Probable ATP-dependent RNA helicase DHX37	1
SIX5	Homeobox protein SIX5	1
HSD17B12	Estradiol 17-beta-dehydrogenase 12	1
NOC2L	Nucleolar complex protein 2 homolog	1
SMC2	Structural maintenance of chromosomes protein 2	1
TADA2B	Transcriptional adapter 2-beta	1
THRA	Thyroid hormone receptor alpha	1
ZNF362	Zinc finger protein 362	1
ERCC3	TFIIH basal transcription factor complex helicase XPB subunit	1
PUS7	Pseudouridylate synthase 7 homolog	1
SSR4	Translocon-associated protein subunit delta	1
EHMT2	Histone-lysine N-methyltransferase EHMT2	1
DMBT1	Deleted in malignant brain tumors 1 protein	1
SDE2	Protein SDE2 homolog	1
FLYWCH2	FLYWCH family member 2	1
MTAP	S-methyl-5'-thioadenosine phosphorylase	1
SPATA5	Spermatogenesis-associated protein 5	1
IGHA1	Ig alpha-1 chain C region	1
COL4A4	Collagen alpha-4(IV) chain	1
CNTNAP3B	Contactin-associated protein-like 3B	1
GSDMA	Gasdermin-A	1
UBTF	Nucleolar transcription factor 1	1
XRN2	5'-3' exoribonuclease 2	1
ADAMTS14	A disintegrin and metalloproteinase with thrombospondin motifs 14	1
FGA	Fibrinogen alpha chain	1
GRM5	Metabotropic glutamate receptor 5	1
AKAP13	A-kinase anchor protein 13	1
S100A9	Protein S100-A9	1
FMN2	Formin-2	1
IL16	Pro-interleukin-16	1
DHX36	Probable ATP-dependent RNA helicase DHX36	1
HIST2H2AC	Histone H2A type 2-C	1
HIST2H2AA3	Histone H2A type 2-A	1
HIST1H1T	Histone H1t	1
MYH14	Myosin-14	1
HNRNPH2	Heterogeneous nuclear ribonucleoprotein H2	1
ZNF292	Zinc finger protein 292	1
