# Supplementary material for: Identification of Ku70 Domain-Specific Interactors Using BioID2
Source: Cells. 2021 Mar 14;10(3):646. doi: 10.3390/cells10030646 (PMC8001828; doi:10.3390/cells10030646)
Supplement: Supplementary file 1 [file cells-10-00646-s001.zip › Table S5 - SAINTexpress candidates scoring greater than or equal to 0.6.xlsx]

## Sheet: Sheet1
Ku70 delta-vWA-BioID2				Ku70 vWA-BioID2
Gene	SAINTexpress Score	BioGRID		Gene	SAINTexpress Score	BioGRID
XRCC6	1	1		C10orf118	1	0
KTN1	0.99	0		DBNL	1	0
APLF	0.99	1		AKAP1	1	0
STAU2	0.97	0		CDC42BPA	1	0
MGME1	0.97	0		PRKAR2A	1	0
DHX29	0.9	0		RABL6	1	0
STAU1	0.87	0		XRCC6	1	1
HDLBP	0.83	0		PSME1	1	0
EIF4G3	0.78	0		GLO1	1	0
ADAR	0.73	1		CNN2	1	0
SNX9	0.67	0		AHNAK	1	0
DUT	0.66	0		PALLD	1	0
TRIM25	0.66	1		DIP2B	1	0
PALLD	0.66	0		NCOR1	1	1
WRN	0.64	1		ARHGEF16	0.98	0
ZC3HAV1	0.64	0		NEDD1	0.98	0
IFT74	0.64	0		NUDT5	0.98	1
MRPS28	0.63	0		TJP2	0.98	0
EFHD2	0.63	0		GLOD4	0.98	0
CSTA	0.61	0		CALD1	0.98	0
TXLNG	0.61	0		IST1	0.97	0
CALD1	0.61	0		LASP1	0.97	0
				ESYT1	0.97	0
1 = in BioGRID, 0 = not in BioGRID				SLX4	0.97	0
				ARCN1	0.97	0
				EFHD2	0.97	0
				NECAP2	0.97	0
				EIF4G3	0.97	0
				CD2AP	0.97	0
				CGN	0.97	0
				HDLBP	0.97	0
				PIPSL	0.95	0
				CCDC43	0.95	0
				CC2D1A	0.95	0
				CTTN	0.94	0
				AFDN	0.93	0
				EIF5A	0.93	0
				TJP1	0.92	0
				RANBP2	0.9	0
				MAP1B	0.9	0
				ANXA2	0.88	0
				C1orf52	0.87	0
				RANGAP1	0.85	0
				NUP214	0.84	0
				SEPTIN7	0.84	1
				HBS1L	0.83	0
				ZMYND8	0.83	1
				MYO6	0.81	0
				ZC3HAV1	0.8	0
				PRDX4	0.8	0
				NOSIP	0.8	0
				CHAF1B	0.79	0
				EIF4B	0.79	0
				APBB1	0.76	0
				ZC3H11A	0.76	1
				EPB41L3	0.75	0
				STMN1	0.75	1
				ACIN1	0.74	1
				MAP2	0.74	0
				UBAP2L	0.7	0
				ZC3H4	0.68	1
				TLN1	0.67	0
				SNCA	0.67	0
				NR3C1	0.67	0
				ZNF687	0.66	0
				TBCB	0.66	0
				ABR	0.66	0
				EML4	0.66	0
				TRIM25	0.66	1
				CCDC85C	0.66	0
				BICD2	0.66	0
				ARPIN	0.65	0
				LARP1	0.65	0
				LMCD1	0.65	0
				PCF11	0.65	1
				GTF2F2	0.65	1
				MAVS	0.65	0
				CARD11	0.65	0
				TOR1AIP1	0.65	0
				EMSY	0.65	1
				PIH1D1	0.65	1
				MACO1	0.65	0
				PDCD4	0.65	0
				PIAS3	0.65	0
				SEPTIN2	0.65	1
				VAPB	0.64	0
				PDLIM3	0.63	0
				DYNC1LI2	0.63	0
				FKBP3	0.63	0
				EDF1	0.63	0
				SNRPD2	0.63	0
				MRPS28	0.63	0
				SBSN	0.63	0
				PRRC2C	0.62	0
				CWF19L1	0.61	0
				CKAP4	0.6	0
				NUP153	0.6	1
